1                   **CDK1 and CDK2 regulate phosphorylation-dependent NICD1 turnover**  
2                                   **and the periodicity of the segmentation clock**

3

4

5   **Francesca Anna Carrieri<sup>1</sup>, Philip Murray<sup>2</sup>, Paul Davies<sup>3</sup>, Jacqueline Kim Dale<sup>1\*</sup>**

6

7   <sup>1</sup>Division of Cell and Developmental Biology, School of Life Sciences, University of Dundee,  
8   Dow Street, Dundee, DD15EH, Scotland, UK.

9   <sup>2</sup>Department of Mathematics, University of Dundee, Nethergate, Dundee, DD14HN, Scotland,  
10   UK.

11   <sup>3</sup>MRC Phosphorylation Unit, School of Life Sciences, University of Dundee, Dow Street,  
12   Dundee, DD15EH, Scotland, UK.

13

14

15   \* Corresponding author: [j.k.dale@dundee.ac.uk](mailto:j.k.dale@dundee.ac.uk)

16   Tel: +44 01382 386290

17 **ABSTRACT**

18 All vertebrates share a segmented body axis. Segments form periodically from the rostral end  
19 of the presomitic mesoderm (PSM) and this periodicity is regulated by the segmentation clock,  
20 a molecular oscillator that drives dynamic clock gene expression across the PSM with a  
21 periodicity that matches somite formation. Notch signalling is crucial to this process. Altering  
22 Notch intracellular domain (NICD) stability affects both the clock period and somite size.  
23 However, the mechanistic details of how NICD stability is regulated are unclear.  
24 We identified a highly conserved site crucial for NICD recognition by the SCF E3 ligase, which  
25 targets NICD for degradation. We demonstrate both CDK1 and CDK2 can phosphorylate  
26 NICD in the domain where this crucial residue lies and that NICD levels vary in a cell cycle-  
27 dependent manner. Inhibiting CDK1 or CDK2 activity increases NICD levels both *in vitro* and  
28 *in vivo*, leading to a delay of clock gene oscillations.

## 29 INTRODUCTION

30 Segmentation, a process which occurs early during vertebrate body plan formation, generates  
31 repeated segments (or somites) that later give rise to the vertebral column, most skeletal  
32 musculature and dermis [1, 2].

33 During somitogenesis, pairs of somites bud off the rostral end of the unsegmented presomitic  
34 mesoderm (PSM) with a periodicity that is species specific. The periodicity of segment  
35 formation is regulated by a molecular oscillator, known as the somitogenesis clock, which  
36 drives oscillatory gene expression within the PSM tissue from which somites are derived [2-  
37 4].

38 These clock genes are targets of the Notch, Wnt and FGF pathways [5, 6]. Aberrant  
39 somitogenesis leads to severe segmentation and skeletal defects [7]. In humans, defects in  
40 segmentation lead to congenital scoliosis (CS), with an infant mortality rate of 50% that  
41 comprises many vertebral skeletal and muscular pathologies, including the family of  
42 spondylocostal dysostoses (SCD). For CS, whilst the aetiology is unclear, linkage analyses  
43 have shown mutations in four genes lead to familial forms of SCD [8]. Significantly these are  
44 components of the Notch pathway, which plays multiple roles during segmentation. Notch is  
45 crucial to the segmentation process in mice, since in the absence of Notch signalling, the  
46 segmentation clock stops and no somites form [9].

47 On a single cell level in the PSM, oscillatory clock gene expression is established through  
48 positive and negative feedback loops of unstable clock gene products which potentiate or  
49 inhibit the pathway that activates them. Synchronisation of clock gene oscillations between  
50 neighbouring cells is reliant on Notch signalling [10-13]. Mathematical models predict the  
51 period of clock gene oscillations can be approximated as a sum of the delays involved in  
52 transcription, splicing, translation and transport of clock gene products, and in particular  
53 through the regulation of the half-lives of both mRNA and protein of unstable regulators [14-  
54 17]. Whilst great progress has been made in demonstrating the role of transcription and  
55 splicing delays in setting the clock period, little experimental work investigating whether  
56 stability of clock components affects clock period has been performed.

57 Most studies addressing the molecular mechanisms regulating the periodicity of clock gene  
58 oscillations have focused on the role of Notch signalling components [10, 18-23]  
59 Notch is one of the major highly conserved signalling pathways that regulate cell-cell  
60 communication which involves gene regulation mechanisms that control multiple processes  
61 during development and adult life [24-31].  
62 Upon extracellular ligand activation, Notch transmembrane receptors are cleaved, releasing  
63 the intracellular domain (NICD) that translocates to the nucleus to regulate expression of  
64 specific developmental gene cohorts [30, 32, 33]. NICD is highly labile, and phosphorylation-  
65 dependent turnover acts to restrict Notch signalling [34-36].  
66 All known canonical Notch activity relies on this regulation of NICD half-life. Moreover,  
67 aberrant NICD turnover contributes to numerous cancers and diseases [24, 28, 37-42].  
68 Despite the multiple impacts of NICD turnover in both development and disease, the molecular  
69 details regulating this turnover remain uncharacterised. The stability of NICD and therefore  
70 duration of the Notch signal is regulated by phosphorylation of the C-Terminal PEST domain  
71 which leads to subsequent recruitment of FBXW7, F-Box and WD Repeat Domain Containing  
72 7, (a key component of the SCF<sup>Se10/FBXW7</sup> E3 ubiquitin ligase complex) [34-36, 43-49].  
73 Ultimately, this leads NICD to ubiquitylation and proteasomal degradation [43, 50-53].  
74 However, the molecular details of NICD degradation mediated by FBXW7 are not well  
75 understood.  
76 A recent study combining experimental and computational biology demonstrated changes in  
77 NICD stability affect the chick and mouse somitogenesis clock period which in turn affects  
78 somite size. In this study a pharmacological approach was used to demonstrate that culturing  
79 chick/mouse PSM explants with broad specificity inhibitors of cyclin-dependent protein  
80 kinases (Roscovitine/DRB) and Wnt signalling (XAV939) leads to elevated levels and a  
81 prolonged NICD half-life and phase shifted clock oscillation patterns both at a tissue level and  
82 in larger segments. Furthermore, reducing NICD production in this assay rescues these effects  
83 [18]. These results imply potential coupling between NICD degradation and the segmentation

84 clock. However, the specific kinases/molecular mechanism of action remain ill-defined and  
85 leave open the question of whether this coupling is a general or conserved mechanism.  
86 In this manuscript we identify the phosphorylated residues within human NICD. We  
87 demonstrate that purified recombinant Cyclin-dependent kinase 1 (CDK1) and Cyclin-  
88 dependent kinase 2 (CDK2) phosphorylate NICD within the PEST domain. A point mutation  
89 affecting a conserved serine residue within this CDK substrate domain of the NICD PEST  
90 motif prevents NICD interaction with endogenous FBXW7. Strikingly, we show that NICD  
91 levels fluctuate in a cell cycle dependent manner anti-correlating with high levels of CDK1/2  
92 activity. Lastly, highly specific inhibitors of CDK1 or CDK2 lead to increased levels of NICD *in*  
93 *vitro* and *in vivo* and delay the mouse somitogenesis clock and somite formation.  
94 Using a mathematical model we show that the experimental observations made in cell lines  
95 and PSM tissue can be explained in a single theoretical framework that couples the cell cycle  
96 to NICD degradation.

## 97 RESULTS

### 98 Roscovitine, DRB and XAV939 increase NICD levels in HEK293, iPS and IMR90 cells

99 Direct phosphorylation of NICD in its PEST domain enhances its turnover and thus  
100 degradation [34-36]. A study using broad range kinase inhibitors demonstrated that the  
101 stability and turnover of NICD is linked to the regulation of the pace of the segmentation clock  
102 across the PSM in chick and mice embryos [18]. However, this study did not define the specific  
103 kinases or molecular mechanism of action of the inhibitors. In order to identify which kinases  
104 are involved in NICD phosphorylation and which residues in the NICD PEST domain are  
105 phosphorylated rendering NICD susceptible to degradation, we employed a cellular model due  
106 to the limiting quantity of material available using embryonic cell lysates.

107 First, we used the same inhibitors as Wiedermann *et al.* [18], and thus investigated if  
108 Roscovitine, DRB and XAV939 elicit the same effect upon NICD levels in a variety of cell  
109 culture models, namely HEK293 (human embryonic kidney), iPS (induced pluripotent stem  
110 cells) and IMR90 (human Caucasian foetal lung fibroblast) cells.

111 Roscovitine is a small molecule belonging to the family of purines. It inhibits cyclin-dependent  
112 kinases (CDKs) through direct competition with ATP for binding at the ATP-binding site of  
113 CDKs [54, 55]. DRB (5,6-dichloro-1- $\beta$ -D-ribofuranosylbenzimidazole) also inhibits CDKs,  
114 particularly CDK7 and 9 [56, 57]. XAV939 is a Wnt inhibitor that stimulates  $\beta$ -catenin  
115 degradation by stabilizing axin through inhibition of the enzymes tankyrase 1 and 2 [58].

116 HEK293, iPS or IMR90 cells treated for 3 hours with each of the three inhibitors at the same  
117 concentrations used in embryonic lysate studies [18] led to an increase in NICD levels  
118 compared to control cells cultured in the presence of DMSO (**Figures 1A-D, Supplementary**  
119 **Figure 1**). In control conditions, NICD was not easily detectable due to its very short half-life.  
120 Quantification of the density of western blot bands in at least three independent experiments  
121 confirmed that the increase in NICD levels was statistically significant after treatment with  
122 Roscovitine, DRB and XAV939, as shown in **Figures 1B, 1D and Supplementary Figure 1B**.  
123 Two other inhibitors were used as positive and negative controls for the assay. LY411575 is  
124 a  $\gamma$ -secretase inhibitor that prevents Notch1 cleavage and thus inhibits activation of target

125 gene expression [59, 60]. As expected, LY411575 treatment significantly reduced NICD levels  
126 (**Figures 1A-D, Supplementary Figure 1**). Phosphorylation of the C-Terminal PEST domain  
127 of NICD leads to recruitment of FBXW7 and thus to NICD ubiquitylation and proteasomal  
128 degradation [34-36, 43, 44, 46-48]. When E3 ligase activity is reduced with the NEDDylation  
129 inhibitor MLN4924 [61], NICD levels increase, since NICD degradation is stopped in the  
130 presence of this compound (**Figures 1A-D, Supplementary Figure 1**).

131 Interestingly, we were able to detect two distinct bands by western blot with the NICD antibody,  
132 particularly when cells were treated with MLN4924. We hypothesised this reflected the  
133 presence of non-phospho and phospho-NICD species. To test this hypothesis, we treated  
134 MLN4924-treated lysates with  $\lambda$  phosphatase which abrogated the appearance of the higher  
135 band by western blot with the NICD antibody (**Figures 1A and 1C**). These data demonstrate  
136 that the higher band detected corresponds to a phosphorylated isoform of NICD.

137 In order to determine if the increased levels of NICD were due to increased NICD production  
138 and/or increased NICD stability, we exposed HEK293 cells to LY411575 treatment for the last  
139 hour of culture, thereby inhibiting the production of new NICD. Under control conditions with  
140 LY411575 treatment in the last hour, NICD levels are very low (**Supplementary Figure 2,**  
141 **lane 2**). However, despite LY411575 treatment in the last hour, cells cultured in the presence  
142 of small molecule inhibitors showed increased levels of NICD compared to the control,  
143 indicating that the increase in NICD levels is not due to increased NICD production, but to an  
144 increased stability (**Supplementary Figure 2**).

145 Taken together, these results show that exposure to this group of inhibitors leads to increased  
146 levels of NICD in a variety of cell lines, in the same way that they do in the mouse and chicken  
147 PSM tissue, suggesting they regulate a conserved mechanism leading to increased NICD  
148 levels and reduced NICD turnover.

149

150 **Phostag analysis following Roscovitine, DRB and XAV939 treatment reveals a variety**  
151 **of NICD phospho-species.**

152 In order to investigate whether this selection of small molecule inhibitors have different effects  
153 on NICD phosphorylation, we treated HEK293 cells with the inhibitors and performed a Phos-  
154 tag assay [62]. Following MLN4924 treatment, a variety of bands indicative of different  
155 phospho-species of NICD was observed (**Figure 1E**). Given that very few bands are present  
156 in the control sample (DMSO, **Figure 1E**), the bands detected after MLN4924 treatment are  
157 likely to be very labile isoforms of the NICD peptide, which are rapidly degraded in the DMSO  
158 sample. In contrast, when whole cell lysate was treated with both MLN4924 and  $\lambda$   
159 phosphatase only one band, of the lowest molecular weight, was detectable, further supporting  
160 the notion that the ladder of bands obtained upon MLN4924 treatment reflects a variety of  
161 unstable phosphorylated NICD isoforms, which is completely depleted in the presence of  $\lambda$   
162 phosphatase (**Figure 1E**). As expected from data showing NICD levels are increased after  
163 inhibitor treatment (**Figures 1A-D**), all three kinase inhibitors Roscovitine, DRB and XAV939  
164 cause a noticeable increase in the number and intensity of bands compared to control cells.  
165 However, compared to the effect seen with MLN4924, phos-tag technology reveals  
166 Roscovitine, DRB and XAV939 have a reduced number of phospho-bands as compared to  
167 MLN4924, indicative of the fact these kinase inhibitors act to reduce NICD phosphorylation.  
168 Moreover, each of the inhibitors presents a distinct profile of NICD phospho-species. These  
169 data suggest that NICD is targeted by several kinases and/or phosphorylation events which  
170 are differentially sensitive to these inhibitors (**Figure 1E**).

171 NICD-FBXW7 interact at the endogenous levels in HEK293 cells, in a phosphorylation-  
172 dependent manner. The involvement of the F-box protein component of the SCF E3 ligase  
173 complex, FBXW7, in NICD degradation has been previously reported [46-48]. However, to  
174 date, the NICD-FBXW7 interaction has only been shown in overexpressed systems [35, 44,  
175 46, 63-66] Thus, we examined the binding of NICD to FBXW7 using co-immunoprecipitation  
176 analysis at the endogenous level.

177 FBXW7 was immunoprecipitated from HEK293 cells treated with DMSO or MLN4924 for 3  
178 hours and extracts were probed with NICD antibody. NICD directly binds to FBXW7 (**Figure**  
179 **2A**). After MLN4924 treatment, the amount of NICD bound to FBXW7 was significantly higher



180 compared to control cells and this was particularly evident with the higher molecular weight  
181 isoform of NICD (**Figures 2A-B**), confirming again NICD-FBXW7 interaction is  
182 phosphorylation-dependent.

183 In order to determine if the change in the NICD phosphorylation profile observed after  
184 treatment with the CDK inhibitors reduced the NICD-FBXW7 interaction, we performed the  
185 same co-immunoprecipitation assay after CDK inhibitor treatment. In order to maximise the  
186 amount of NICD immunoprecipitated with FBXW7, cells were treated with MLN4924 (to  
187 prevent NICD degradation) in the presence or absence of the CDK inhibitors. A significantly  
188 reduced interaction between NICD and FBXW7 was observed after treating HEK293 cells with  
189 Roscovitine or DRB for 3 hours (**Figures 2C and 2E**). Statistical analyses, carried out on the  
190 density of western blot bands after immunoprecipitation, confirmed a significant reduction in  
191 the interaction between NICD and FBXW7 following either Roscovitine or DRB treatment  
192 (**Figures 2D and 2F**).

193 Taken together, these data demonstrate, for the first time, that NICD interacts with FBXW7 at  
194 endogenous levels in HEK293 cells, and this interaction is dependent on phosphorylation.

195 To further validate the involvement of FBXW7 in endogenous NICD turnover, we conducted a  
196 siRNA-mediated depletion of FBXW7 in HEK293 cells (**Figure 2G**). siRNA treatment efficiently  
197 depleted FBXW7 protein levels and led to an increase in levels of the FBXW7 target protein  
198 Cyclin E. FBXW7 depletion also resulted in increased levels of NICD, and, in particular, an  
199 accumulation of the phosphorylated form of NICD (**Figure 2G**).

200

### 201 **Serine 2513 is essential for the NICD-FBXW7 interaction**

202 We utilised Mass Spectrometry as an unbiased approach to identify which NICD residues are  
203 phosphorylated in HEK293 cells transiently transfected with human NICD-GFP, followed by  
204 immunoprecipitation of NICD-GFP. Gel slices were processed and submitted to MS analysis.  
205 We identified 15 phospho-sites on exogenous hNICD, highlighted in green in **Figure 3A**. To  
206 investigate the relevance of those phosphorylation sites in NICD turnover, we screened those  
207 located within the PEST domain (such as S2527), and others based on the FBXW7 phospho-

208 degron motif (such as S2205, S2513, S2516, S2538) which is known to be [RK] S/T P [RK] X  
209 S/T/E/D, where X is any amino acid and RK is any amino acid except arginine (R) or lysine  
210 (K) [67].

211 Thus, we generated 5 peptides each carrying a serine to alanine point mutation in an identified  
212 site. Following transient transfection of HEK293 cells with wild-type or mutated peptides we  
213 performed immunoprecipitation using GFP-conjugated beads, to evaluate peptide binding  
214 efficiency with endogenous FBXW7.

215 In 2004, Fryer and colleagues proposed that CDK8 phosphorylates serine residues 2481,  
216 2484, 2506 (2513, 2516, 2538 in our annotation). They reported that when all of these residues  
217 were mutated from serine to alanine, *in vitro* phosphorylation by recombinant CyClinC:CDK8  
218 was dramatically reduced [35], suggesting these sites could be implicated in NICD stability.  
219 However, we find individual mutations on serine residues 2205, 2516, 2527 and 2538 did not  
220 affect the NICD-FBXW7 interaction (**Figure 3B, Supplementary Figure 3**). However,  
221 mutating serine 2513 to alanine, to render this residue non-phosphorylatable, completely  
222 abolished the NICD-FBXW7 interaction (**Figure 3B**). Cells transfected with the double mutant  
223 S2513A/S2516A also showed a dramatic loss of the NICD-FBXW7 interaction. This did not  
224 reflect a reduction in the level of immunoprecipitated GFP (**Figure 3B**).

225 Thus, our data suggest that only serine 2513, of those we have tested, is the key NICD  
226 phosphorylation site required for interaction with FBXW7, and thus potentially crucial for NICD  
227 stability and turnover.

228

### 229 **Cyclin Dependent Kinase (CDK) 1 and 2 phosphorylate NICD *in vitro***

230 Previous reports have proposed a number of potential kinases which may be involved in NICD  
231 phosphorylation and turnover, including CyclinC:CDK8 [35], CyclinC:CDKs [65] and GSK3 $\beta$   
232 [34, 36]. The MRC-PPU Kinase Profiling Inhibitor Database ([http://www.kinase-  
233 screen.mrc.ac.uk/kinase-inhibitors](http://www.kinase-screen.mrc.ac.uk/kinase-inhibitors)) (University of Dundee) indicates that, at the  
234 concentrations used in our assays, Roscovitine, in particular, is a potent inhibitor of CDK2, but  
235 a very weak inhibitor of CK1, GSK3 $\beta$  and more than 50 other kinases tested. In order to

236 confirm results derived from the Kinase Profiling Inhibitor Database, we performed a kinase  
237 assay in collaboration with the MRC-PPU International Centre for Kinase Profiling. We tested  
238 three NICD phospho-peptides against the activity of a panel of different kinases including  
239 CDK1 and CDK2 (**Table 1**). Of seven kinases tested, 5 had no specific activity against any of  
240 the peptides. In contrast, CDK1 and CDK2 elicited a very high activity against Peptide 1, which  
241 contained serine residues 2513 and 2516, previously identified by Mass spectrometry analysis  
242 to be phosphorylated in NICD and in particular 2513 we have shown to be crucial for the NICD-  
243 FBXW7 interaction.

244 These results demonstrate that CDK1 and CDK2 phosphorylate the C-terminal region of NICD  
245 *in vitro*. Therefore, we decided to evaluate the contribution of these kinases to endogenous  
246 NICD turnover and FBXW7 interaction in the cell lines. CDK2 siRNA treatment in HEK293  
247 cells efficiently depleted CDK2 protein levels, with no effect on levels of CDK4. Under these  
248 conditions NICD levels were significantly increased compared to control scrambled siRNA  
249 treated cells, indicative of reduced NICD turnover (**Figures 4A-B**).

250 We repeated this assay and depleted CDK1 by a siRNA-mediated approach in HEK293 cells.  
251 Under these conditions we also observed an increase in NICD protein levels compared to the  
252 control (**Figure 4C**), and this increase was statistically significant (**Figure 4D**). Interestingly,  
253 we also detected elevated levels of CDK2 and CDK8 following CDK1 depletion, suggesting a  
254 possible compensation effect was occurring upon CDK1 knockdown. Nevertheless, this did  
255 not prevent the effect of loss of CDK1 upon NICD turnover.

256 CDK8 has previously been proposed as a potential kinase involved in NICD phosphorylation  
257 and turnover [35, 65]. We monitored NICD levels following efficient siRNA-mediated depletion  
258 of CDK8 in HEK293 cells. This resulted in very slightly elevated NICD levels (**Figures 4E-F**).  
259 These data suggest CDK8 may also phosphorylate NICD and regulate its turnover as  
260 previously proposed [35, 65].

261 Taken together, these data provide further validation of CDK1 and CDK2 involvement in NICD  
262 phosphorylation and turnover.

263

264 **Pharmacological inhibition of CDK2 and CDK1 activity increases levels of NICD *in vitro***

265 As a complementary approach to siRNA-mediated loss of function, we selected two small  
266 molecule inhibitors that have a highly selective inhibitory activity against CDK2 kinase:  
267 (Purvalanol B and GSK650394A). The specificity of each of these kinase inhibitors has been  
268 tested (at two different concentrations) by the International Centre for Kinase profiling within  
269 the MRC Protein Phosphorylation Unit at the University of Dundee. At 1 and 10  $\mu\text{M}$ ,  
270 Roscovitine specifically inhibits more than 96% of CDK2 activity. Purvalanol B inhibits more  
271 than 95% CDK2 activity, at 0.1 and 1  $\mu\text{M}$ . GSK650394A inhibits 99% of CDK2 activity at both  
272 1 and 10  $\mu\text{M}$  (**Figure 5A**). CDK2 is by far the most sensitive target for all three inhibitors  
273 (**Figure 5A**). HEK293 cells treated with Roscovitine, Purvalanol B or GSK650394A (10  $\mu\text{M}$ ,  
274 0.1  $\mu\text{M}$  and 10  $\mu\text{M}$ , respectively) for 3 hours exhibited significantly increased NICD levels  
275 compared to control DMSO treated cells (**Figures 5B-C**). Under these conditions protein  
276 levels of both CDK2 and Cyclin E were not affected (data not shown). iPS cells cultured 3  
277 hours in the presence of 0.1  $\mu\text{M}$  Purvalanol B also exhibited significantly elevated levels of  
278 NICD as compared to DMSO treated control cells, indicating this is a conserved effect of CDK2  
279 (**Supplementary Figures 4A-B**).

280 Given our observation that both CDK1 and CDK2 can phosphorylate NICD peptides *in vitro*,  
281 we similarly treated HEK293 cells with a CDK1 specific inhibitor, RO-3306 [68]. Following  
282 exposure to 10  $\mu\text{M}$  of RO-3306 for 3 hours HEK293 cells showed elevated NICD levels  
283 compared to control DMSO treated cells (**Figures 5D-E**). These data further support the  
284 hypothesis that both CDK1 and CDK2 are likely to be involved in phosphorylation-mediated  
285 regulation of NICD turnover.

286

## 287 **NICD levels fluctuate over the cell cycle**

288 It is well known that CDK1 and CDK2 share several substrates, with a consequent functional  
289 redundancy [69]. Our data demonstrate that these two kinases can phosphorylate NICD *in*  
290 *vitro* and in the absence of either kinase NICD levels increase in HEK293 cells suggesting  
291 they are not acting redundantly in this context. In order to further test this, we analysed whether  
292 NICD levels fluctuate during the cell cycle where the role of both CDK1 and CDK2 has been  
293 extensively reported in regulating transition to distinct cell cycle phases [70].

294 To that end, we synchronised HEK293 cells by using a double thymidine block assay. After  
295 releasing from the second thymidine block, cells were collected at indicated time points and  
296 cell cycle characterization was performed by Fluorescence Activated Cell Sorting (FACS)  
297 (**Figure 6A**). **Figure 6A** shows the distribution through the cell cycle of HEK293 cells after  
298 synchronization at early S-Phase (0 hour), as previously reported [71]. Two and four hours  
299 post release, the majority of cells were in S-phase. At six hours post release, the majority of  
300 cells were in G2 phase, while eight hours after release, the majority of cells were in late  
301 G2/early M phase. At ten hours post release, the majority of cells had exited mitotic phase and  
302 already entered G1. After twelve hours from release, cells were in mid/late G1 of the new cell  
303 cycle (**Figure 6A**). The graph in **Figure 6B** represents the cell cycle distribution of HEK293  
304 cells at distinct time points post double thymidine block and release from three independent  
305 experiments analysed by FACS. Western blotting analysis of synchronized HEK293 cell  
306 extracts showed the expression of several cell cycle regulatory proteins at the same distinct  
307 time points reflecting distinct cell cycle phases as described above (**Figure 6C**). Interestingly,  
308 we found that NICD levels fluctuated in a striking manner during the cell cycle, whereas we  
309 saw no change to levels of FBXW7. At 2, 4, 8 and 12 hours post release, we observed a  
310 dramatic decrease of NICD expression corresponding to CDK2-dependent G1/S phase,  
311 whereas the decrease 8 hours after double thymidine block release occurred in the CDK1-  
312 dependent G2/M phase transition. These data suggest that NICD levels fluctuate during the  
313 cell cycle in a CDK1 and CDK2-dependent manner.

314 In addition, we analysed the cell cycle distribution by FACS in HEK293 cells after CDK2-siRNA  
315 mediated depletion, which we have shown leads to a significant increase in NICD levels  
316 (**Figure 4A**) and we observed a statistically significant accumulation of cells in G1 phase  
317 compared to the control, as expected for cells deprived of CDK2 activity and therefore unable  
318 to pass the G1/S checkpoint (**Figures 6D-E**). These data suggest that the drop in NICD levels  
319 occurring in G1/S phase is due to CDK2 phosphorylation of NICD.

320

### 321 **Pharmacological inhibition of CDK2 increases NICD levels and delays the pace of the** 322 **segmentation clock in mouse PSM explants**

323 In order to address whether CDK2 phosphorylation of NICD is involved in driving the NICD-  
324 FBXW7 interaction, we performed a co-immunoprecipitation assay with FBXW7 antibody and  
325 analysed NICD by western blot after CDK2 inhibitor treatment. As above, in order to maximise  
326 the amount of NICD immunoprecipitated HEK293 cells were treated with MLN4924 (to prevent  
327 NICD degradation) +/- Purvalanol B (0.1  $\mu$ M). A significantly reduced interaction between  
328 NICD and FBXW7 was observed after treating HEK293 cells with Purvalanol B for 3 hours.  
329 This did not reflect a reduction in the level of immunoprecipitated FBXW7 (**Figure 7A**).  
330 Statistical analysis on the density of western blot bands after immunoprecipitation, confirmed  
331 an extremely significant reduction in the NICD-FBXW7 interaction following Purvalanol B  
332 treatment (**Figure 7B**).

333 In order to address the potential *in vivo* role of CDK-mediated NICD phosphorylation during  
334 somitogenesis, we cultured E10.5 mouse PSM explants for 4 hours in the presence of 1 $\mu$ M of  
335 Purvalanol B. Initially we analysed NICD levels by western Blot and just as in the *in vitro*  
336 context, CDK2 inhibition resulted in increased NICD levels as compared to control embryos  
337 (**Figure 7C**). This provides the first *in vivo* evidence CDK2 is likely to be involved in NICD  
338 turnover.

339 Previous reports have suggested perturbations to NICD turnover leading to increased NICD  
340 levels/stability are closely linked to an increase in the period of segmentation clock oscillations  
341 in the PSM [18]. To further explore whether clock gene oscillations were delayed following

342 CDK2 inhibition, we used the half-embryo assay, where the PSM from one half of an E10.5  
343 mouse embryo is cultured in control media, while the contralateral half from the same embryo  
344 is cultured in the presence of 1 $\mu$ M of Purvalanol B for 4 hours. In 55.5% of cases examined  
345 (n=10/18), exposure of PSM explants to Purvalanol B caused a delay in the pace of oscillatory  
346 *mLfg* expression across the PSM as compared to the control explant (**Figure 7D**). Also, in  
347 some cases the treated explant (“+”) developed one somite less compared to the control  
348 (**Figure 7D**).

349 Additionally, we cultured E10.5 mouse PSM explants in the presence or absence of the CDK1  
350 inhibitor, RO-3306, for 4 hours at 10 $\mu$ M. Analysis of NICD levels by western blot revealed that  
351 inhibition of CDK1 leads to elevated levels of NICD compared to control embryos (**Figure 7E**).  
352 E10.5 mouse half embryo explants exposed to RO-3306 treatment for 4 hours showed  
353 delayed clock oscillations of *mLfg* as compared to DMSO treated contralateral half embryo  
354 explants (**Figure 7F**). These data, not only support our *in vitro* findings, but importantly  
355 provide, for the first time, the *in vivo* evidence that CDK1 and CDK2 are involved in NICD  
356 stability and turnover and that this molecular regulation of NICD turnover is extricably linked  
357 to the pace of the segmentation clock.

358

### 359 **Mathematical model links NICD regulation and cell cycle**

360 To understand how our findings on the molecular details of NICD regulation in individual cells  
361 give rise to tissue-scale delay of the segmentation clock, we first developed a mathematical  
362 model of NICD production and degradation in HEK293 cells. The variables in the model define  
363 the position of a cell in the cell cycle, the amount of NICD and the amount of phosphorylated  
364 NICD (pNICD) at time  $t$ . The model enables us to connect assumptions about molecular  
365 processes in individual cells with experiments performed on a large population of cells.

366 We assume a  $K$ -compartment model that describes sequential progression of a cell through  
367 the cell cycle (**Figure 8A**). It is assumed that CDKs that phosphorylate NICD, resulting in its  
368 interaction with FBXW7 and subsequent degradation, are active in some  $m$  of the cell cycle  
369 states. We assume that: (i) NICD exists in non-phosphorylated and phosphorylated forms; (ii)



370 NICD is produced at constant rate  $k_1$ ; (iii) both forms of NICD get degraded at background  
371 rate  $k_7$ ; (iv) NICD gets phosphorylated by CDKs at rate  $k_3$ ; (v) pNICD degrades at rate  $k_6$  with  
372  $k_6 > k_7$ ; and (vi) dephosphorylation of NICD occurs at rate  $k_2$ . We consider the  
373 pharmacological perturbations as follows: LY411575 treatment experiments, in which NICD  
374 production is inhibited, are simulated by setting  $k_1 = 0$ ; Purvalanol B/Roscovitin treatment  
375 experiments, which target only CDK2, reduce the number of compartments where CDKs are  
376 active by a factor of two; and MLN4924 treatment, which inhibits FBXW7 mediated  
377 degradation of NICD, are simulated by removing the fast mode of decay ( $k_6 = 0$ ).

378 By averaging cellular descriptions of NICD and the cell cycle over a given cell population, we  
379 derive equations describing the average levels of total NICD (i.e. as measured in a Western  
380 Blot experiment, see Methods). Upon release from double thymidine block, cells are  
381 synchronised in the cell cycle and there are relatively high levels of CDK activity at different  
382 times post release. As pNICD degrades faster, high levels of CDK results in lower levels of  
383 NICD (see **Figure 8** and **Figures 4A-D, 5B-E, 6C, 7C-E**). We find the model qualitatively fits  
384 the experimental observations if NICD is phosphorylated in two separate time windows post  
385 release. We propose that these windows correspond to activity of CDK2 (G1/S phase) and  
386 CDK1 (M phase) (**Figures 8A** and **8B**). In a situation where the cell cycle is desynchronised,  
387 the population-averaged phosphorylation rate ( $mk_3/K$ , where  $m/K$  is the fraction of the cell  
388 cycle where CDKs are active) is a fraction of the true phosphorylation rate. The model can  
389 reproduce Western Blot results from DMSO and MLN4924 experiments (**Figure 8C**), allowing  
390 inference of the parameters  $k_2$  and  $k_3$ . Notably, the simulated Purvalanol B/Roscovitin  
391 treatment experiment presented in Figure 8C is a prediction that is validated by the  
392 experimental data.

393 To explore how CDK inhibition results in delay of the segmentation clock we introduce an  
394 additional variable representing phase of the somitogenesis clock and assume that the caudal  
395 PSM behaves like a population of phase coupled oscillators. In Wiederman et al. we proposed  
396 a model that showed how competition between activators and inhibitors of clock gene



397 transcription could lead to the oscillator period being an increasing function of NICD half-life  
398 [18]. Here, we impose, without explicitly describing the molecular circuitry, this assumption.  
399 We assume that each cellular oscillator has a natural frequency  $\omega_i(t)$  that is a function of cell  
400 cycle position; when CDKs are active the baseline clock frequency,  $\omega_0$ , is increased by an  
401 acceleration factor  $r$  (**Figure 8D**). As the cell cycle is asynchronous in the PSM, it is therefore  
402 comprised of a population of oscillators with frequencies  $\omega_0$  or  $\omega r_0$ . Given sufficiently strong  
403 coupling a population of such oscillators yields synchronous oscillations with a period that is  
404 an average of the individual oscillator periods (**Figures 8E-8F**). Upon CDK inhibition, the  
405 relative number of faster oscillators is reduced hence the average period decreases (**Figure**  
406 **8E**). Hence the cell cycle somitogenesis coupled model provide a mechanistic description of  
407 how CDK-mediated phosphorylation of NICD can result in the observed phenotype in PSM  
408 tissue (**Figure 7**).

## 409 DISCUSSION

410 The Notch pathway plays multiple critical roles in somitogenesis. Notch signalling is critical for  
411 dynamic clock gene expression and for somite formation in mice [9]. Notch-Delta signalling is  
412 essential to synchronise clock gene oscillations among neighbouring cells of the PSM [10-13].  
413 Moreover, a recent publication using a pharmacological approach, has shown that modulating  
414 the half-life of NICD affects the clock oscillation period and somite size [18]. It is important to  
415 note that NICD degradation and turnover still occurred under these conditions but less  
416 efficiently. In this study, we have significantly extended those findings to determine the  
417 mechanistic details of regulation of NICD turnover, and we report for the first time that cell  
418 cycle-dependent CDK1 and CDK2 activity is involved in NICD turnover, which has broad  
419 implications across all developmental and disease contexts where Notch plays a role.

420 We demonstrate that kinase inhibitors (Roscovitine, DRB and XAV939), previously shown to  
421 prolong NICD half-life and delay the segmentation clock pace in mouse and chick PSM *in vivo*,  
422 [18] also increased endogenous levels of human NICD when a range of primary human cell  
423 lines were treated for 3 hours. This highlights the conserved effect of these inhibitors on  
424 regulating NICD stability, which is perhaps not surprising given the high degree of sequence  
425 similarity between mouse, human and chicken NICD.

426 We demonstrate that, following exposure to these kinase inhibitors, the increased stability of  
427 NICD accompanies a change in the array of phosphorylated isoforms of NICD observed. The  
428 different profiles of phosphorylated isoforms of NICD observed, following exposure to each of  
429 the inhibitors, suggest they each inhibit distinct kinases. In each case, however, the highest  
430 molecular bands were no longer visible. It is possible that the multiple phosphorylation bands  
431 are indicative of unique events, some of which may reflect priming phosphorylation events that  
432 facilitate or increase the efficiency of secondary phosphorylation events, which then act as  
433 phospho-degron signals to recruit E3 ligases that target NICD for degradation. It is not possible  
434 to determine whether the lower molecular weight bands that remain, following inhibitor  
435 treatment, are indicative of the loss of primary or secondary phosphorylation events.

436

437 A number of reports have highlighted the fact that the SCF<sup>FBXW7</sup> E3 ligase plays an important  
438 role in NICD degradation [35, 44, 46-48, 66]. SCFs (Skp1, Cullin-1, F-box protein) are a class  
439 of E3 ligases that use Cullin-1 as a scaffold and F-box proteins as substrate receptors. FBXW7  
440 is an evolutionary conserved F-box protein. Substrate phosphorylation instigates FBXW7  
441 binding to a conserved CDC4 phospho-degron motif which then recruits the rest of the E3  
442 ligase complex, including Cullin1, thereby targeting the substrate for ubiquitination and  
443 subsequent degradation by the proteasome [45, 49]. The role of FBXW7 in NICD regulation  
444 is also supported by data showing that, when mammalian Sel-10 (homologue of FBXW7 in *C.*  
445 *elegans*) is mutated, NICD is much more stable [46]. To date, the interaction between NICD  
446 and FBXW7 by co-immunoprecipitation has only been shown using overexpressed proteins,  
447 due to the fact this interaction is very transient and leads to efficient degradation of NICD [35,  
448 44, 47, 48, 66]. In order to stabilise the interacting complex, we conducted experiments in the  
449 presence of MLN4924, a Cullin1 neddylation inhibitor which prevents activation of Cullin1.  
450 Under these conditions, we demonstrate for the first time that NICD and FBXW7 can interact  
451 at endogenous levels in HEK293 cells. Moreover, this allowed us to demonstrate that, when  
452 phosphorylation is disrupted by small molecule CDK inhibitors (Roscovitine or DRB), the  
453 NICD-FBXW7 interaction is reduced. It is important to note that neither inhibitor abolished the  
454 NICD-FBXW7 interaction which suggests again that they are each inhibiting only some of the  
455 kinase activity involved in NICD phosphorylation and subsequent recruitment of FBXW7. This  
456 aligns with the observation that in the chick/mouse PSM both of these inhibitors increase NICD  
457 stability and the period of the segmentation clock but that NICD turnover still occurs in this  
458 tissue, and thus is dependent on a number of different kinases/phosphorylation events  
459 differentially targeted by these two inhibitors [18].

460 By Mass Spectrometry analysis, we identified 15 phospho-sites within human exogenous  
461 NICD in HEK293 cells, some of which have been previously identified and reported to be  
462 involved with NICD turnover [35, 65]. Among those phospho-sites identified, we found that  
463 Serine 2513, when mutated to alanine, thereby rendering the site non phosphorylatable, was  
464 essential for the interaction between NICD and FBXW7. Point mutations in a number of other

465 phosphorylated residues showed these are non-essential for this NICD-FBXW7 interaction,  
466 including two residues that have previously been reported to potentially be required for the  
467 interaction; S2484 and S2506 (S2516 and S2538 in our annotation) [35, 66]. However, Fryer  
468 and colleagues used exogenous proteins and mutated all three sites simultaneously so the  
469 individual contribution/requirement of each residue was not addressed in that study. O'Neil  
470 and colleagues have also reported, using exogenous proteins, that phosphorylation of the  
471 Threonine residue at T2487 in mouse NICD (T2511 in our annotation) is key to driving the  
472 NICD-FBXW7 interaction and subsequent ubiquitination of NICD [44]. We did not observe  
473 phosphorylation at this residue in human NICD. However it would be interesting to repeat the  
474 mass spec analysis using different enzyme digestions to determine if this reveals additional  
475 phosphorylated sites that play a role in this interaction.

476 SCF substrates typically have many phospho-degrons that can be widely dispersed. It will be  
477 important to test the requirement of all the phosphorylated residues we have identified in NICD  
478 for driving and regulating the NICD-FBXW7 interaction.

479 We have identified CDK1 and CDK2 as two kinases that can phosphorylate NICD in the PEST  
480 region that harbours residue serine 2513, which we have demonstrated to be crucial for the  
481 interaction between NICD and FBXW7. Through two loss of function approaches, namely  
482 siRNA and a pharmacological approach, we further demonstrated the role of both CDK1 and  
483 CDK2 kinases in the regulation of NICD turnover. Indeed, by transfecting HEK293 cells with  
484 CDK1, or CDK2 specific siRNA, or treating HEK293 cells or iPS cells with highly selective  
485 small molecule inhibitors against CDK1 and CDK2, we could appreciate an increase in NICD  
486 levels, indicating that inhibiting phosphorylation by CDK1 or CDK2, renders NICD more stable.  
487 As described above, the serine 2513 residue has previously been reported to potentially be  
488 involved in NICD turnover in other systems [35]. Using gain and loss of function experiments  
489 with exogenous proteins, the authors reported phosphorylation occurred through  
490 CyclinC:CDK8. Indeed, by transfecting HEK293 cells with CDK8 specific siRNA, we could also  
491 appreciate an increase in NICD levels, indicating that this kinase could also play a role in NICD

492 turnover, although the effect appears less dramatic compared to that observed with CDK1 or  
493 CDK2 specific siRNA.

494 CDK1 and CDK2 activity and thus phosphorylation of their substrates changes in a cell cycle  
495 dependent manner [72]. Strikingly, we find that NICD levels vary in HEK293 cells in a cell  
496 cycle-dependent way such that we observe lowest levels of NICD in phases of the cell cycle  
497 where CDK1/Cyclin B1 and CDK2/Cyclin E levels are highest and therefore when these  
498 complexes are reported to be most active [73]. This finding suggests that NICD activity, signal  
499 duration and signal strength is likely to vary in a cell cycle dependent manner, potentially  
500 leading to differential transcriptional output in different phases of the cell cycle.

501 Given our findings, it is striking that CDK2 homozygous *null* mice are viable [74]. However, it  
502 has been reported that CDK1 and CDK2 share more than 50% of their targets [75] which is  
503 likely to allow for a lot of redundancy in this knock-out line, as CDK1 can compensate for loss  
504 of CDK2 by forming active complexes with A-, B-, E- and D-type cyclins. The CDK1-*null*  
505 homozygous mice however are embryonic lethal and a CDK2 knock-in to the CDK1 locus is  
506 unable to rescue this phenotype [76, 77]. It would be interesting to examine the role of the  
507 CDK1 conditional mutant in the context of Notch signalling and somitogenesis [78].  
508 Interestingly, Cyclin C-*null* mice, which are embryonic lethal at 10.5, show dramatically  
509 reduced NICD1 phosphorylation *in vivo*, and elevated NICD1 levels. The authors show that  
510 Cyclin C can complex with CDK3, CDK19, CDK8, CDK1 and CDK2 to phosphorylate NICD1  
511 and promote NICD1 degradation [65]. Thus, it would be very interesting to examine a PSM  
512 conditional Cyclin C loss of function to determine whether this cyclin is involved in regulating  
513 NICD turnover in this tissue. It is noteworthy Cyclin C levels did not appear to vary in a cell  
514 cycle dependent manner in HEK293 cells, although it is possible the activity of Cyclin C/CDK  
515 complexes varies in a cell cycle-dependent manner through post-translational modifications  
516 rather than protein levels per se.

517 The finding that CDK1 inhibition or CDK2 inhibition leads to increased levels of NICD in E10.5  
518 mouse embryo PSM lysates and to a delay in clock gene oscillations and somite formation  
519 provides the first *in vivo* evidence that both CDK1 and CDK2 are involved in NICD turnover.

520 It is noteworthy that inhibition of CDK2 activity with a highly selective inhibitor reduces the  
521 NICD-FBXW7 interaction in HEK293 cells but does not block it completely, as we saw with  
522 Roscovitine and DRB. Indeed, inhibition of CDK1 or CDK2 in the mouse PSM with highly  
523 selective inhibitors raises NICD levels and also slows, but does not block, dynamic Notch  
524 target clock gene expression, and somitogenesis. This suggests that some NICD turnover  
525 persists under these conditions, possibly through redundancy between CDK1 and 2 and/or  
526 through CDK8-mediated phosphorylation, the subsequent recruitment of E3 ligases and  
527 degradation of NICD. Moreover, a report by Chiang *et al.* has also identified a region  
528 downstream of the PEST sequence, termed S4, that is involved in NICD degradation, but that  
529 is independent of FBXW7 activity [79]. These data indicate there are several mechanisms  
530 regulating NICD turnover which are partially redundant.

531 We also developed a mathematical model that coupled cell cycle dynamics to NICD  
532 degradation. Using HEK293 cells, model parameters were identified that recapitulated the  
533 distributions of cells in the different cell cycle phases. To recover qualitative features of NICD  
534 thymidine release experiments, NICD phosphorylation was required at distinct stages in the  
535 cell cycle. After using MLN4924 and control experiments to estimate NICD phosphorylation  
536 rate the model qualitatively predicts the effect of Roscovitine/PurB treatment on total NICD  
537 levels. To address the likely effect of CDK2 inhibition in the PSM, the model was extended to  
538 account for position of a cell in the segmentation clock cycle. Following Wiederman *et al.* [18],  
539 it was assumed that levels of NICD are anti-correlated with clock somitogenesis frequency.  
540 Hence, the posterior PSM is represented by a population of phase coupled oscillators whose  
541 frequency is cell cycle dependent. Simulating CDK2 inhibition removes a pool of faster  
542 oscillators thus reducing the tissue period.

543 Notch plays a key role as a gatekeeper protecting progenitor and/or stem cells in multiple  
544 developmental contexts, in part through preventing differentiation and in part through  
545 regulating components of the cell cycle [80-82]. Our novel finding of a reciprocal auto-  
546 regulatory role between the cell cycle regulated CDKs, CDK1 and CDK2, and NICD turnover

547 has potentially great relevance to the developmental biology community and may provide  
548 additional insight into disease/cancer contexts where this autoregulation may have gone awry.

549 **Figure 1**

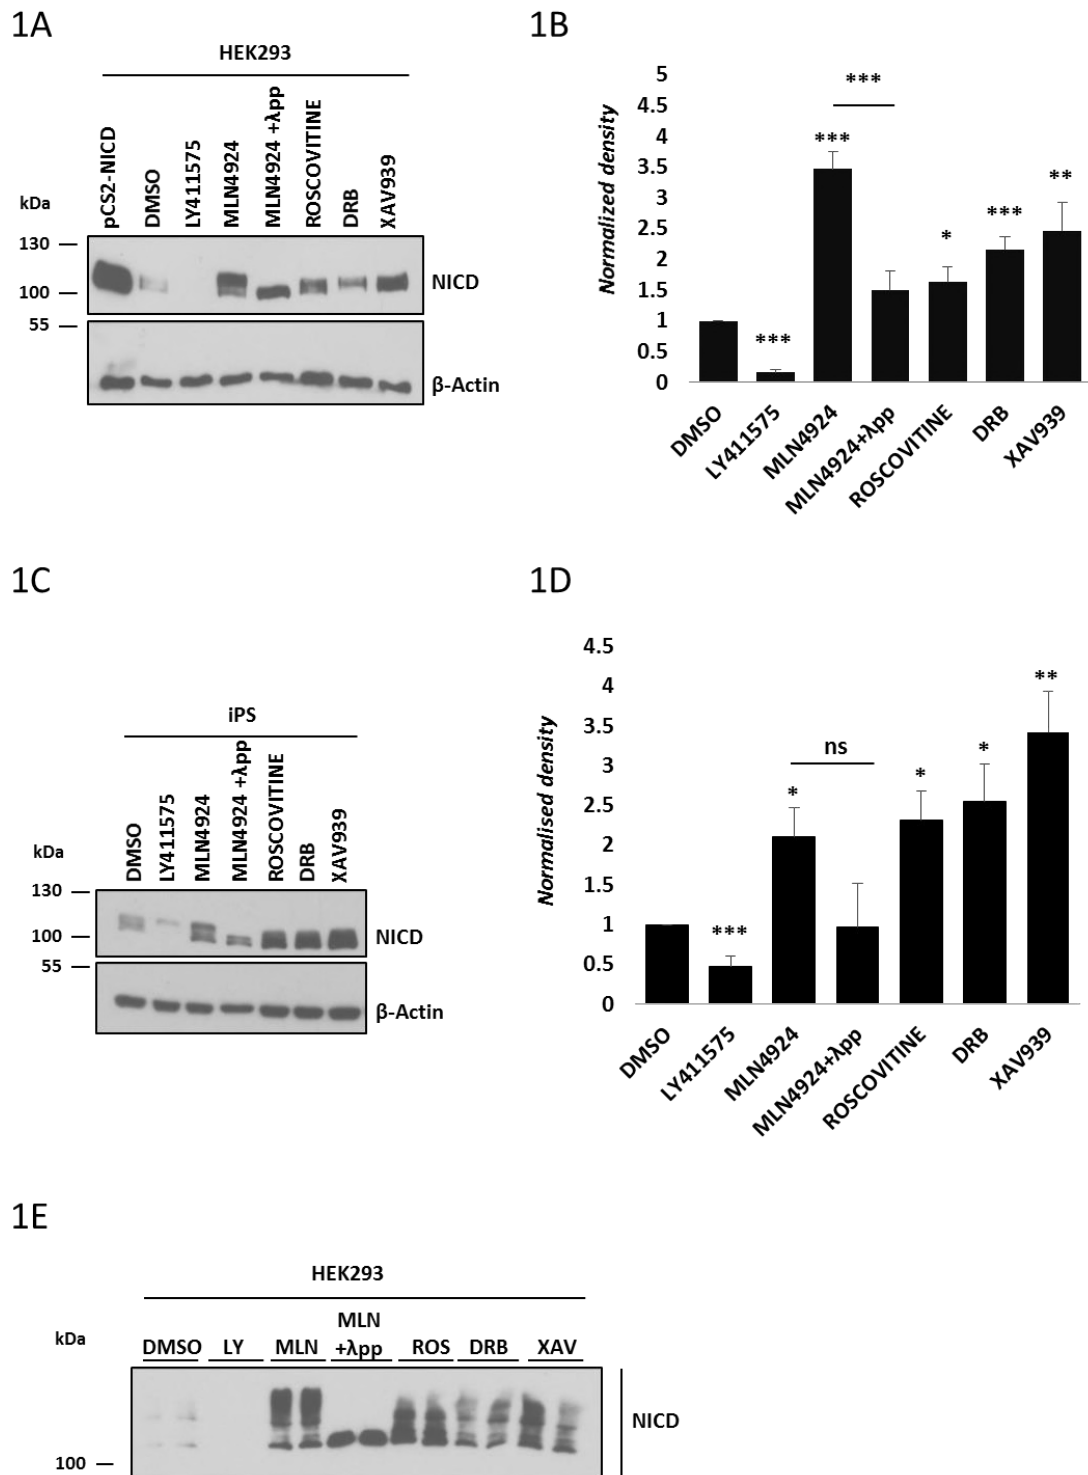

550

551

552 **Figure 1. Endogenous NICD levels increase in HEK293 cells following treatment with**  
 553 **Roscovitine, DRB and XAV939.**

554 (A) HEK293 cells were treated for 3 hours with 150 nM of LY411575, 1 μM of MLN4924, 10  
 555 μM of Roscovitine, 10 μM DRB or 10 μM XAV939. DMSO served as vehicle control.



556 Transfection with pCS2-NICD vector served as positive control. Western blot analysis reveals  
557 that NICD levels were increased upon treatment with Roscovitine, DRB, XAV939, or  
558 MLN4924. NICD is undetectable following LY411575 treatment. NICD antibody detects a  
559 doublet following inhibitor treatment and the top band disappears following  $\lambda$  phosphatase  
560 treatment indicating that this top band is a phosphorylated isoform.  $\beta$ -Actin served as loading  
561 control.

562 (B) Quantification of the density of western blot bands in (A) using ImageJ software. Data are  
563 expressed as fold changes compared to DMSO treatment. All data represent the mean  $\pm$  SEM  
564 from three independent experiments. Student's t-test analysis was performed with \* $p \leq 0.05$ ,  
565 \*\* $p \leq 0.01$ , \*\*\* $p \leq 0.001$ .

566 (C) iPS cells were treated for 3 hours with 150 nM of LY411575, 1  $\mu$ M of MLN4924, 10  $\mu$ M of  
567 Roscovitine, 10  $\mu$ M DRB or 10  $\mu$ M XAV939. DMSO has been used as vehicle control. Western  
568 blot analysis reveals that NICD levels were increased upon treatment with Roscovitine, DRB,  
569 XAV939, or MLN4924. NICD is undetectable following LY411575 treatment. NICD antibody  
570 detects a doublet following Inhibitor treatment and the top band disappears following  $\lambda$   
571 phosphatase treatment indicative that this top band is a phosphorylated isoform.  $\beta$ -Actin  
572 served as loading control.

573 (D) Quantification of the density of western blot bands in (C) using ImageJ software. Data are  
574 expressed as fold changes compared to DMSO treatment. All data represent the mean  $\pm$  SEM  
575 from three independent experiments. Student's t-test analysis was performed with \* $p \leq 0.05$ ,  
576 \*\* $p \leq 0.01$ , \*\*\* $p \leq 0.001$ .

577 (E) HEK293 cells were treated with the same inhibitors as described in (A). NICD  
578 phosphorylation status was analysed by a Phos-tag assay. DMSO served as vehicle control.  
579 NICD phosphorylation profile varies following Roscovitine, DRB, XAV939 or MLN4924  
580 treatment. Following  $\lambda$  phosphatase treatment none of the high molecular weight bands are  
581 visible indicating they are all phosphorylated isoforms.

582 **Figure 2**

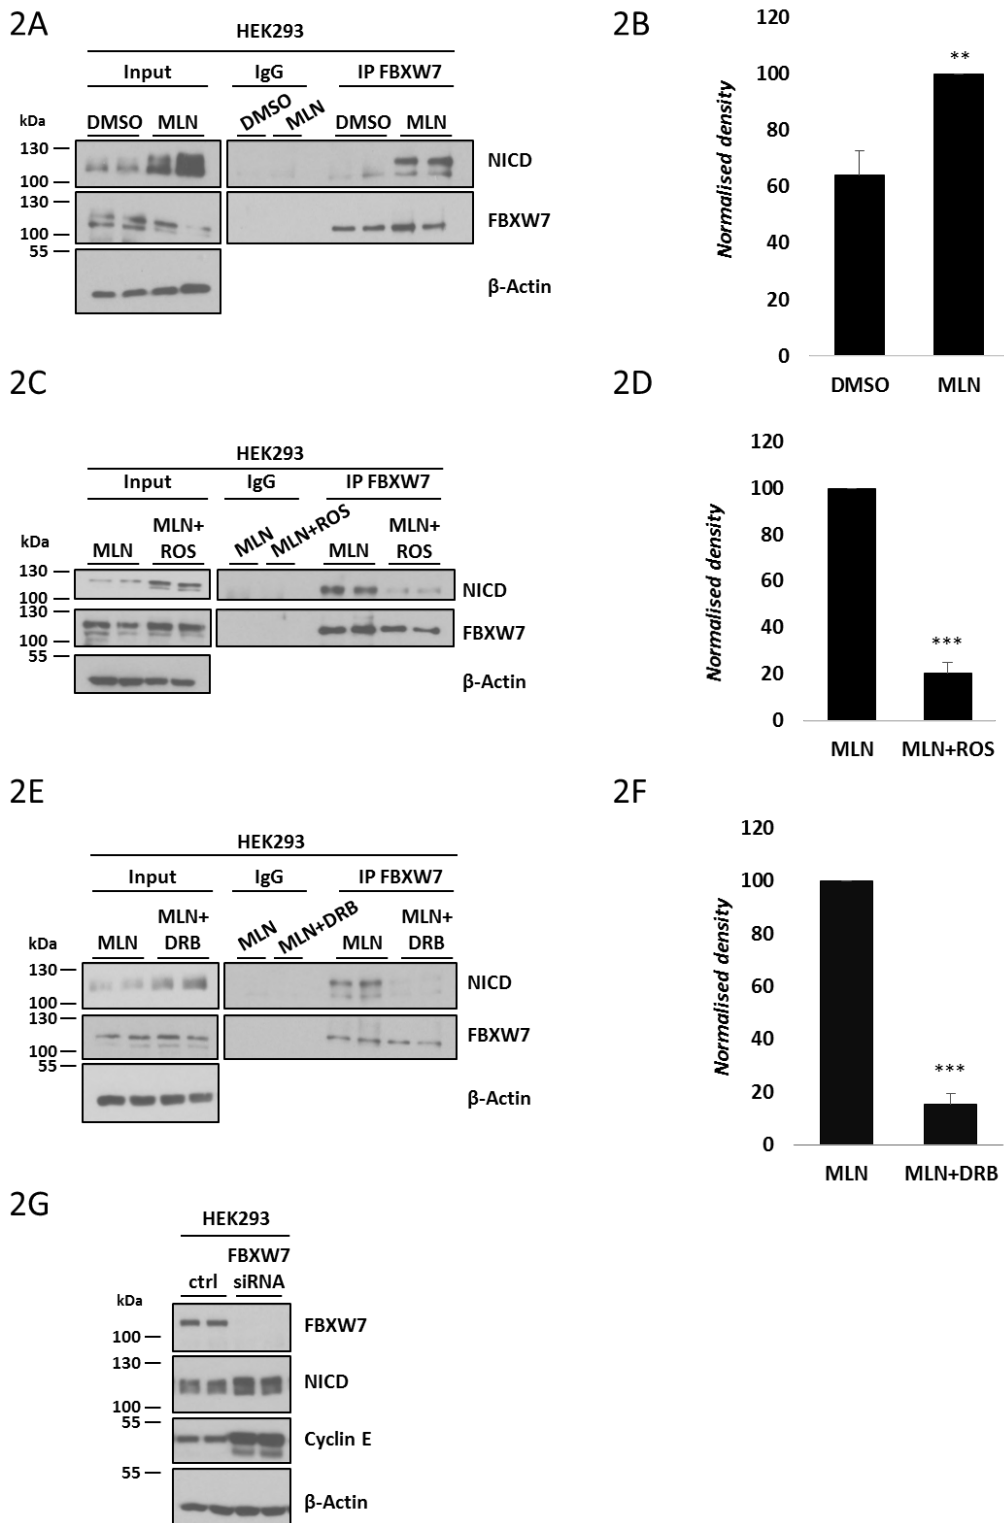

583

584

585 **Figure 2. NICD and FBXW7 interact directly at endogenous levels.**

586 (A) NICD interaction with FBXW7 at endogenous levels in HEK293 cells. 500  $\mu$ g of HEK293  
 587 cell lysates treated with DMSO or MLN4924 were subjected to immunoprecipitation using

588 FBXW7 antibody, or IgG antibody as negative control, and precipitated material was analysed  
589 by western blot using NICD antibody. Western blot with FBXW7 antibody served as loading  
590 control for immunoprecipitation efficiency. 10% of cell lysate before immunoprecipitation was  
591 used as input control and  $\beta$ -Actin served as loading control.

592 (B) Quantification of the density of western blot bands in (A) performed by ImageJ software.  
593 Data are expressed as fold changes compared to DMSO. All data represent the mean  $\pm$  SEM  
594 from three independent experiments. Student t-test was used to determine p values, with  
595  $**p \leq 0.01$ .

596 (C) Roscovitine treatment reduced the NICD-FBXW7 interaction. 500  $\mu$ g of HEK293 cell  
597 lysates treated with MLN4924 or MLN4924 together with Roscovitine were subjected to  
598 immunoprecipitation using FBXW7 antibody, or IgG antibody as negative control, and  
599 precipitated material was analysed by western blot using NICD antibody. Western blot with  
600 FBXW7 antibody served as loading control for immunoprecipitation efficiency. 10% of cell  
601 lysate before immunoprecipitation was used as input control and  $\beta$ -Actin served as loading  
602 control.

603 (D) Quantification of the density of western blot bands in (C) performed by ImageJ software.  
604 Data are expressed as fold changes compared to MLN4924 treated samples. All data  
605 represent the mean  $\pm$  SEM from three independent experiments. Student's t-test analysis was  
606 performed, with  $***p \leq 0.001$ .

607 (E) Interaction between NICD and FBXW7 is reduced following DRB treatment. 500  $\mu$ g of  
608 HEK293 cell lysates treated with MLN4924 or MLN4924 together with DRB were subjected to  
609 immunoprecipitation using FBXW7 antibody, or IgG antibody as negative control, and  
610 precipitated material was analysed by western blot using NICD antibody. Western blot with  
611 FBXW7 antibody served as loading control for immunoprecipitation efficiency. 10% of cell  
612 lysate before immunoprecipitation was used as input control and  $\beta$ -Actin served as loading  
613 control.

614 (F) Quantification of the density of western blot bands in (E) performed by ImageJ software.  
615 Data are expressed as fold changes compared to MLN4924 treated samples. All data  
616 represent the mean  $\pm$  SEM from three independent experiments. Student's t-test analysis was  
617 performed, with  $***p \leq 0.001$ .

618 (G) Inhibiting endogenous FBXW7 modulates endogenous NICD levels. HEK293 cells were  
619 transfected with control (scrambled siRNA) or FBXW7 siRNA. Levels of FBXW7, NICD and  
620 Cyclin E were determined by western blot.  $\beta$ -Actin served as loading control.

621 **Figure 3**

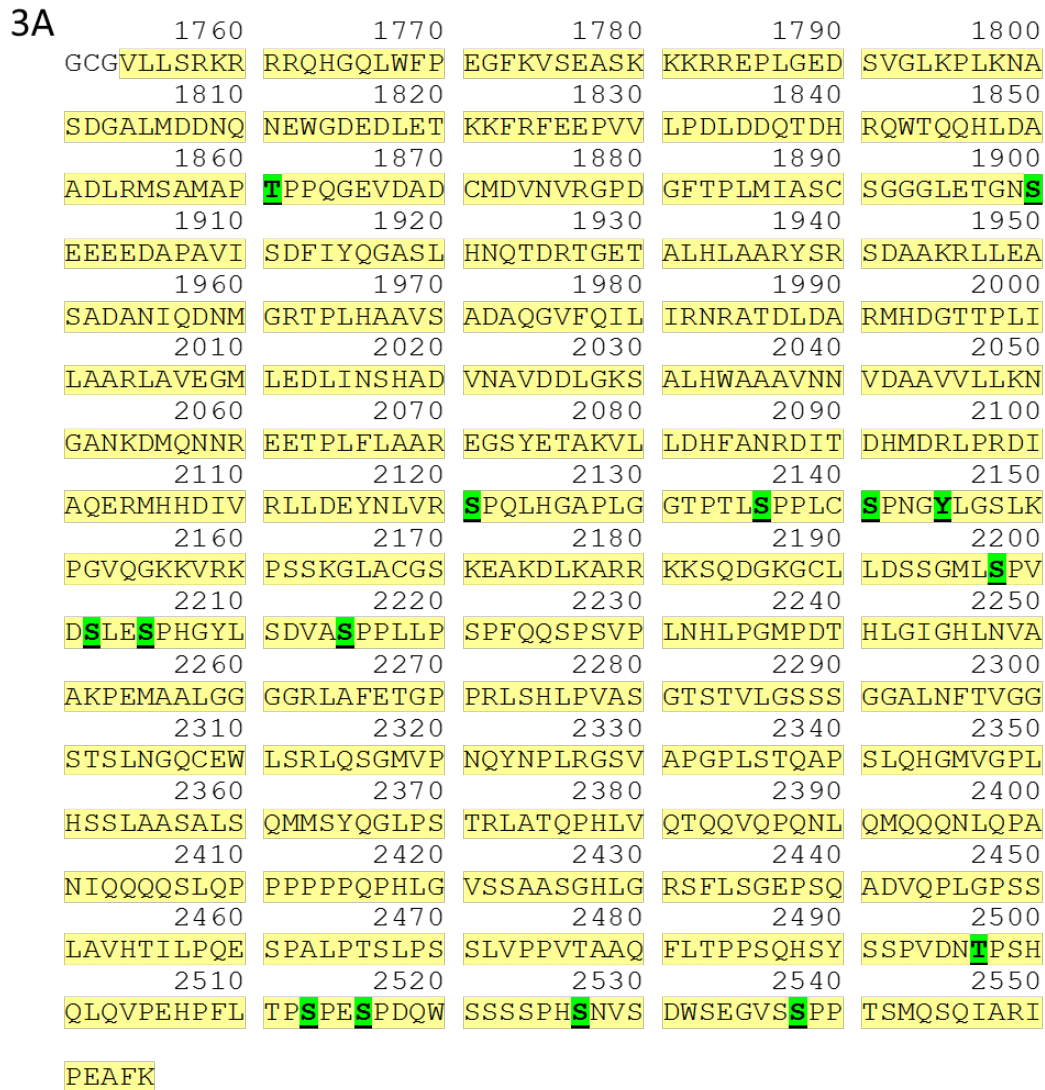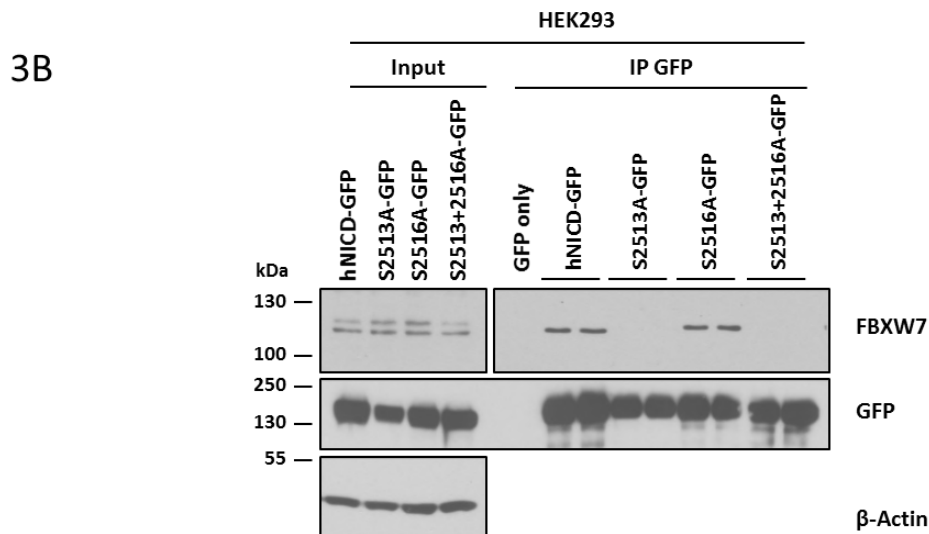

622

623

624 **Figure 3. Mass spectrometry analysis of phosphorylated residues in hNICD.**

625 (A) LC-MS-MS analysis of in-gel-digested HEK293 cells transfected with hNICD-GFP, and  
626 subjected to immunoprecipitation using GFP antibody, identified multiple phosphorylation sites  
627 in NICD, highlighted in green.

628 (B) Phosphorylation of serine 2513, but not serine 2516, is required for the NICD-FBXW7  
629 interaction. hNICD-GFP phospho-mutant peptides encoding non-phosphorylatable residues  
630 at S2513 and/or 2516 (serine to alanine) were expressed in HEK293 cells. The exogenously  
631 expressed protein was subsequently immunoprecipitated with anti-GFP antibody and  
632 precipitated material was analysed by western blot using FBXW7 antibody. Wild-type hNICD-  
633 GFP and GFP only vectors were included as positive and negative controls, respectively.  
634 Western blot using GFP antibody served as immunoprecipitation efficiency control.  $\beta$ -Actin  
635 has been used as loading control for the input lanes.

636 **Table 1**

| <i>Specific activity (U/mg)</i> | <i>Peptide 1</i> | <i>Peptide 2</i> | <i>Peptide 3</i> | <i>Control</i> |
|---------------------------------|------------------|------------------|------------------|----------------|
| Cdk1/CyclinA2                   | 1035.43          | 35.21            | -7.86            | 1322           |
| Cdk1/CyclinB                    | 887.23           | 37.46            | 0.04             | 1566           |
| Cdk2/CyclinA                    | 79.7             | 0.5              | 0                | 117.7          |
| Cdk5/p35                        | 47               | 0.8              | 0.5              | 1729.5         |
| Cdk7/MAT1/CyclinH               | 0.1              | 0.2              | 0.1              | 21.6           |
| Cdk9/CyclinT1                   | 2.7              | 0.6              | 0.3              | 66.4           |
| CK1 $\alpha$                    | 0                | 0                | 0.1              | 19.1           |
| GSK $\beta$                     | 1                | 1                | 1.1              | 552.5          |

**Peptide 1: S2513 and S2516**

**Peptide 2: S2538**

**Peptide 3: S2141**

HPFLTPSPESPDQWSSSSPH

NVSDWSEGVSSPPTSMQSQIA

GTPTLSPPLCSPNGYLGSLKP

637

638

639 **Table 1. CDK1 and CDK2 exhibit specific activity against a NICD phospho-peptide by *in***

640 ***vitro* kinase assay.** Three NICD phospho-peptides were tested for the activity of seven

641 different kinases (CDK1, CDK2, CDK5, CDK7, CDK9, CK1 $\alpha$  and GSK $\beta$ ). A known substrate

642 was used as control for each kinase. The specific activity of each kinase is expressed in *U/mg*.

643 Peptide 1 contains serine residues 2513 and 2516 (HPFLTPSPESPDQWSSSSPH).

644 Peptide 2 includes serine 2538 (NVSDWSEGVSSPPTSMQSQIA).

645 Peptide 3 encompasses serine residue 2141 (GTPTLSPPLCSPNGYLGSLKP).

646 **Figure 4**

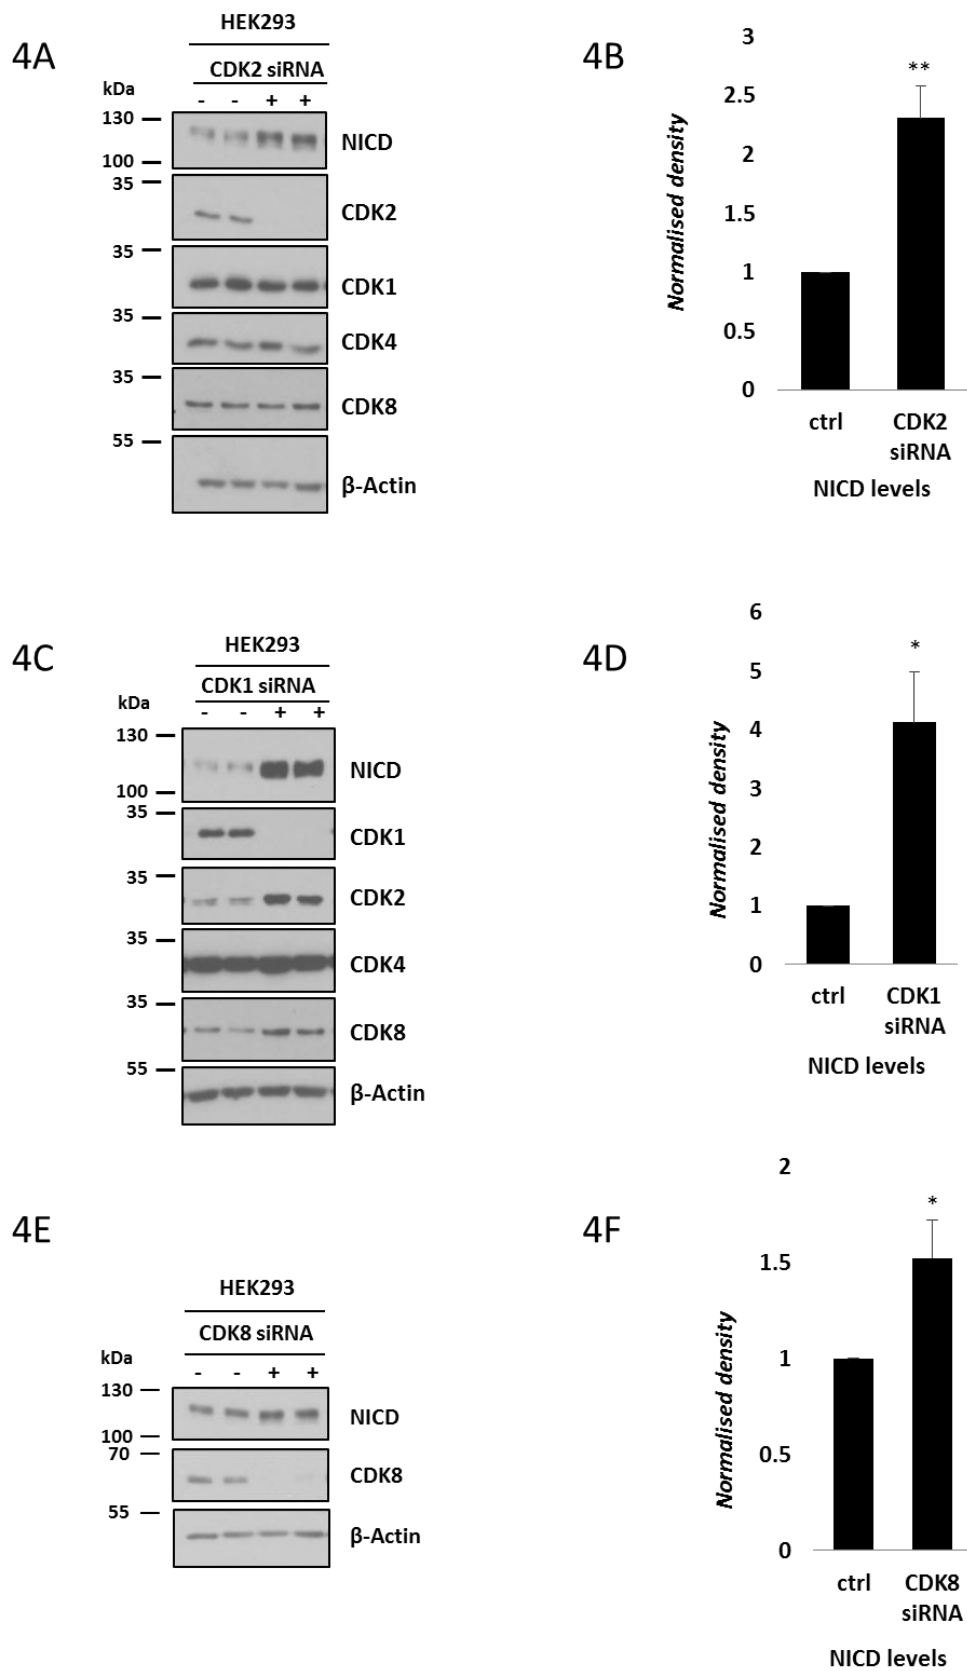

647

648 **Figure 4. CDK1, CDK2 and CDK8 depletion increased endogenous levels of NICD in**  
649 **HEK293 cells.**

650 (A) HEK293 cells were cultured for 48h after transfection with plasmids encoding scrambled  
651 siRNA (-) or siRNA specific for CDK2 (+) followed by western blot for NICD, CDK2, CDK1,  
652 CDK4 and CDK8.  $\beta$ -Actin served as loading control.

653 (B) Quantification of the density of western blot bands in (A) performed by ImageJ software.  
654 Data are expressed as fold changes compared to control (scrambled siRNA transfected) cell  
655 lysate. All data represent the mean  $\pm$  SEM from three independent experiments. Student's t-  
656 test analysis was performed, with  $**p \leq 0.01$ .

657 (C) HEK293 cells were cultured for 48h after transfection with plasmids encoding scrambled  
658 siRNA (-) or siRNA specific for CDK1 (+) followed by Western blot for NICD, CDK1, CDK2,  
659 CDK4 and CDK8.  $\beta$ -Actin has been used as loading control.

660 (D) Quantification of the density of western blot bands in (C) performed by ImageJ software.  
661 Data are expressed as fold changes compared to control (scrambled siRNA transfected) cell  
662 lysate. All data represent the mean  $\pm$  SEM from three independent experiments. Student's t-  
663 test analysis was performed, with  $*p \leq 0.05$ .

664 (E) HEK293 cells were cultured for 48h after transfection with plasmids encoding scrambled  
665 siRNA or siRNA specific for CDK8, followed by western blot for NICD and CDK8.  $\beta$ -Actin has  
666 been used as loading control.

667 (F) Quantification of the density of western blot bands in (E) performed by ImageJ software.  
668 Data are expressed as fold changes compared to control (scrambled siRNA transfected) cell  
669 lysate. All data represent the mean  $\pm$  SEM from three independent experiments. Student's t-  
670 test analysis was performed, with  $*p \leq 0.05$ .



671 **Figure 5**

5A

|              | % activity remaining |            |                     |           |                   |            |
|--------------|----------------------|------------|---------------------|-----------|-------------------|------------|
|              | <i>Roscovitine</i>   |            | <i>Purvalanol B</i> |           | <i>GSK650394A</i> |            |
|              | 1 $\mu$ M            | 10 $\mu$ M | 0.1 $\mu$ M         | 1 $\mu$ M | 1 $\mu$ M         | 10 $\mu$ M |
| CDK2-CyclinA | 4                    | 3          | 5                   | 2         | 1                 | 0          |
| CK1          | 76                   | 30         | 107                 | 58        | 12                | 3          |
| GSK3         | 76                   | 102        | 91                  | 62        | 78                | 23         |
| CK2          | 92                   | 102        | 101                 | 62        | 82                | 46         |
| CSK          | 88                   | 103        | 96                  | 75        | 96                | 98         |
| ERK1         | 82                   | 60         | 102                 | 61        | 75                | 39         |
| PLK1         | 91                   | 73         | 106                 | 69        | 31                | 5          |
| CHK2         | 93                   | 67         | 98                  | 40        | 40                | 28         |

5B

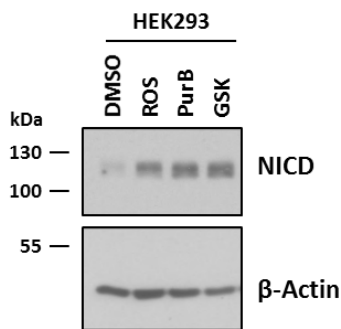

5C

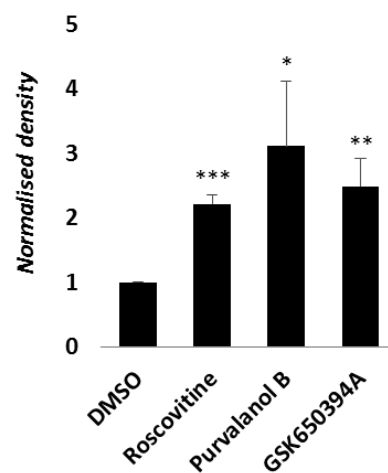

5D

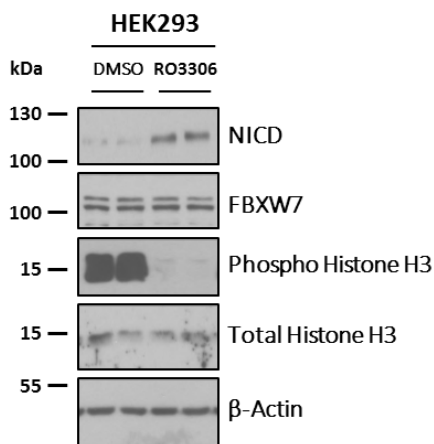

5E

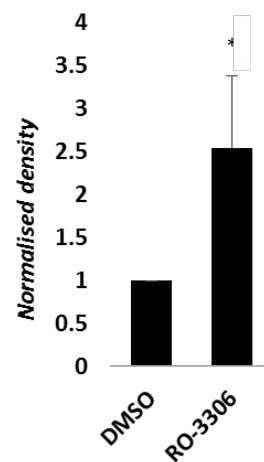

672

673 **Figure 5. Pharmacological inhibition of CDK1 and CDK2 leads to increased NICD levels**  
674 ***in vitro*.** (A) Analysis of the inhibitory activity of three highly selective CDK2 inhibitors against  
675 a panel of kinases - a selection of those tested is shown here. At both 1 and 10 $\mu$ M, Roscovitine  
676 is able to inhibit more than 95% of CDK2 activity, but is far less effective against other kinases.  
677 Purvalanol B (0.1 and 1 $\mu$ M) inhibits more than 94% of CDK2 activity. At both 1 and 10  $\mu$ M,  
678 GSK650394A is able to inhibit more than 98% of CDK2 activity. Source: The Kinase Profiling  
679 Inhibitor Database (<http://www.kinase-screen.mrc.ac.uk/kinase-inhibitors>).  
680 (B) HEK293 cells were treated with three highly selective CDK2 inhibitors (10  $\mu$ M of  
681 Roscovitine, 0.1 $\mu$ M of Purvalanol B and 10 $\mu$ M of GSK650394A) for 3 hours. Endogenous  
682 levels of NICD were detected by western blot.  $\beta$ -Actin served as loading control.  
683 (C) Quantification of the density of western blot bands in (B) using ImageJ software. Data are  
684 expressed as fold changes compared to DMSO. All data represent the mean  $\pm$  SEM from  
685 three independent experiments. Student's t-test analysis was performed, with \* $p \leq 0.05$ ,  
686 \*\* $p \leq 0.01$ , and \*\*\* $p \leq 0.001$ .  
687 (D) HEK293 cells were treated with RO-3306, a specific CDK1 inhibitor, for 3 hours at 10  $\mu$ M.  
688 Levels of NICD, FBXW7, phospho-Histone H3 and Histone H3 were detected by western blot.  
689  $\beta$ -Actin was used as loading control.  
690 (E) Quantification of the density of western blot bands in (D) using ImageJ software. Data are  
691 expressed as fold changes compared to DMSO. All data represent the mean  $\pm$  SEM from  
692 three independent experiments. Student's t-test analysis was performed, with \* $p \leq 0.05$ .

693 **Figure 6**

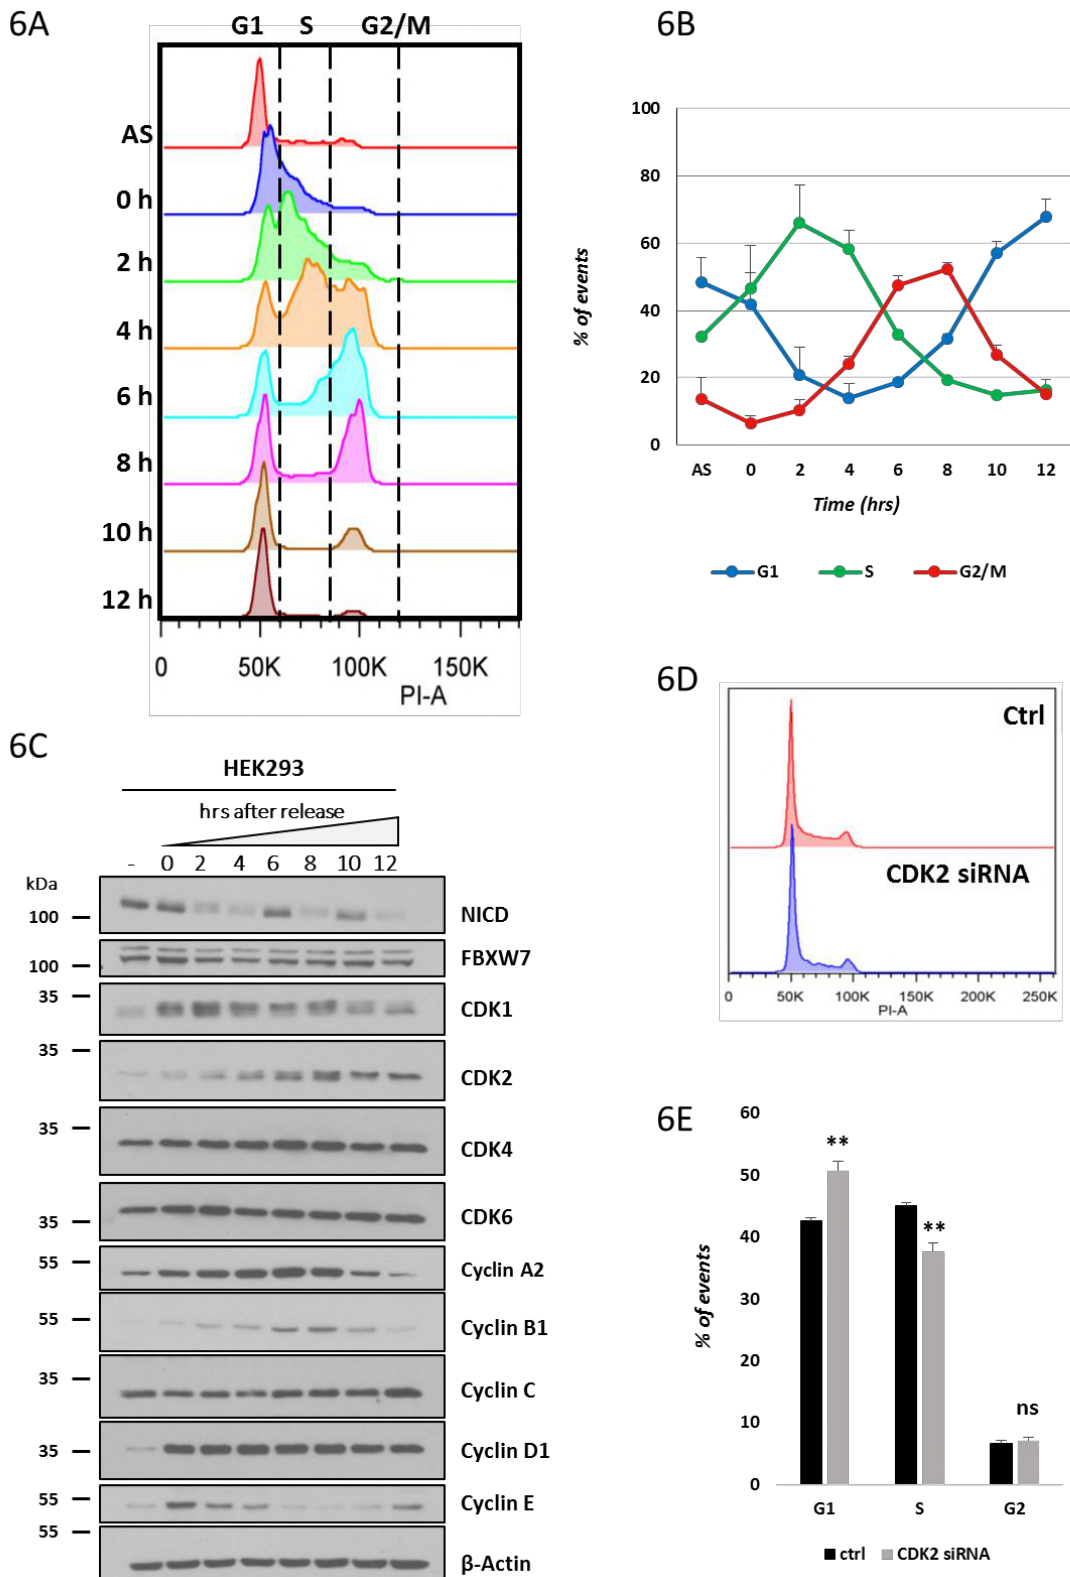

694

695

696 **Figure 6. NICD levels fluctuate during the cell cycle.** (A) Cell cycle profile for HEK293 cells

697 released from synchronization after double thymidine block. Cells were released and

698 harvested at the indicated time points (AS= asynchronous). Analysis of cell cycle arrest and  
699 release was performed using propidium iodide (PI) staining and flow cytometry. A  
700 representative experiment of three performed is shown.

701 (B) Chart of flow cytometry data shows the percentage of HEK293 cells in G1, S and the G2/M  
702 phases after release from double thymidine treatment. Time points are expressed as mean  $\pm$   
703 SEM from three independent experiments.

704 (C) Expression of the indicated proteins in HEK293 cells was examined by western blotting,  
705 and  $\beta$ -Actin was used as loading control. This summary is a representation of three  
706 independent experiments.

707 (D) Cell cycle profile for HEK293 cells 48h after transfection with plasmids encoding scrambled  
708 siRNA or siRNA specific for CDK2. Analysis of cell cycle arrest and release was performed  
709 using propidium iodide (PI) staining and flow cytometry. A representative experiment of three  
710 performed is shown.

711 (E) Graph of flow cytometry data shows the percentage of cells in given cell-cycle phases 48h  
712 after transfection with plasmids encoding scrambled siRNA or siRNA specific for CDK2. Graph  
713 represents the mean of three independent experiments. All data represent the mean  $\pm$  SEM  
714 from three independent experiments. Student's t-test analysis was performed, with \*\* $p \leq 0.01$   
715 (ns=not significant).

716 **Figure 7**

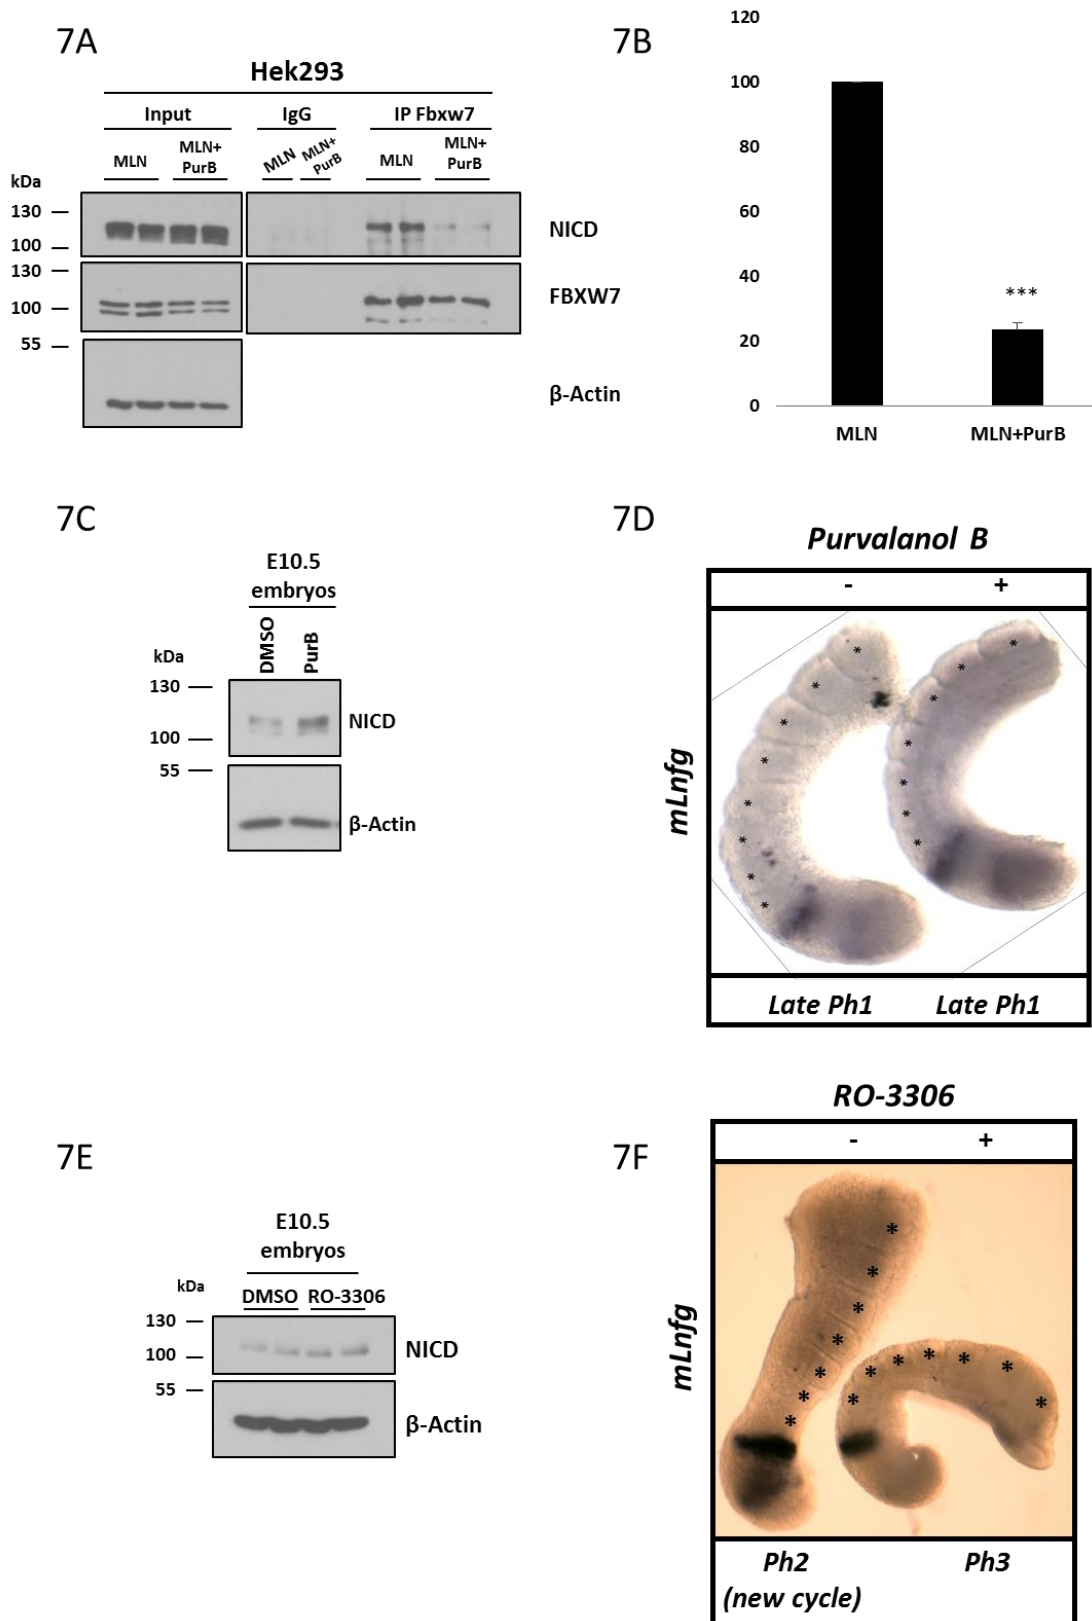

717

718 **Figure 7. Purvalanol B treatment reduces NICD-FBXW7 interaction and delays the pace**  
719 **of the segmentation clock in mouse PSM explants.** (A) Purvalanol B treatment reduced  
720 the NICD-FBXW7 interaction. 200 µg of HEK293 cell lysates treated with MLN4924 or  
721 MLN4924 in combination with 0.1 µM of Purvalanol B were subjected to immunoprecipitation  
722 using FBXW7 antibody, or IgG antibody as negative control, and precipitated material was  
723 analysed by western blot using NICD antibody. Western blot with FBXW7 antibody served as  
724 loading control for immunoprecipitation efficiency. 10% of cell lysate before  
725 immunoprecipitation was used as input control and β-Actin has been used as loading control.  
726 (B) Quantification of the density of western blot bands in (A) performed by ImageJ software.  
727 Data are expressed as fold changes compared to MLN4924 treated samples. All data  
728 represent the mean ± SEM from three independent experiments. Student's t-test analysis was  
729 performed, with \*\*\*p≤0.001.  
730 (C) E10.5 mouse tails were bisected down the midline. One half (+) was cultured for 4 hrs in  
731 the presence of Purvalanol B (1 µM). The contralateral half (-) was cultured for 4h in the  
732 presence of DMSO. Control or treated explants were pooled and NICD levels were detected  
733 by western blot. β-Actin was used as loading control.  
734 (D) Bisected E10.5 mouse PSM explants were cultured in the absence (-) or presence (+) of  
735 1µM of Purvalanol B for 4 hours and then analysed by *in situ* hybridization for *mLfgn* mRNA  
736 expression. Purvalanol B treated explant has one less somite than the control explant and the  
737 treated explant is in the same late phase 1 of the oscillation cycle of dynamic *mLfgn* mRNA  
738 expression indicating it is a whole cycle delayed compared to the “-” explant.  
739 (E) E10.5 mouse tails were bisected down the midline. One half (+) was cultured for 4 hrs in  
740 the presence of RO-3306 (10 µM). The contralateral half (-) was cultured for 4h in the presence  
741 of DMSO. Control or treated explants were pooled and NICD levels were detected by western  
742 blot. β-Actin has been used as loading control.  
743 (F) Bisected E10.5 mouse PSM explants were cultured in the absence (-) or presence (+) of  
744 10 µM of RO-3306 for 4 hours and then analysed by *in situ* hybridization for *mLfgn* mRNA  
745 expression. RO-3306 treated explant has one less somite than the control explant and the  
746 treated explant is in a phase behind of the oscillation cycle of dynamic *mLfgn* mRNA  
747 expression indicating there is a delay in the oscillation compared to the “-” explant.

748 **Figure 8**

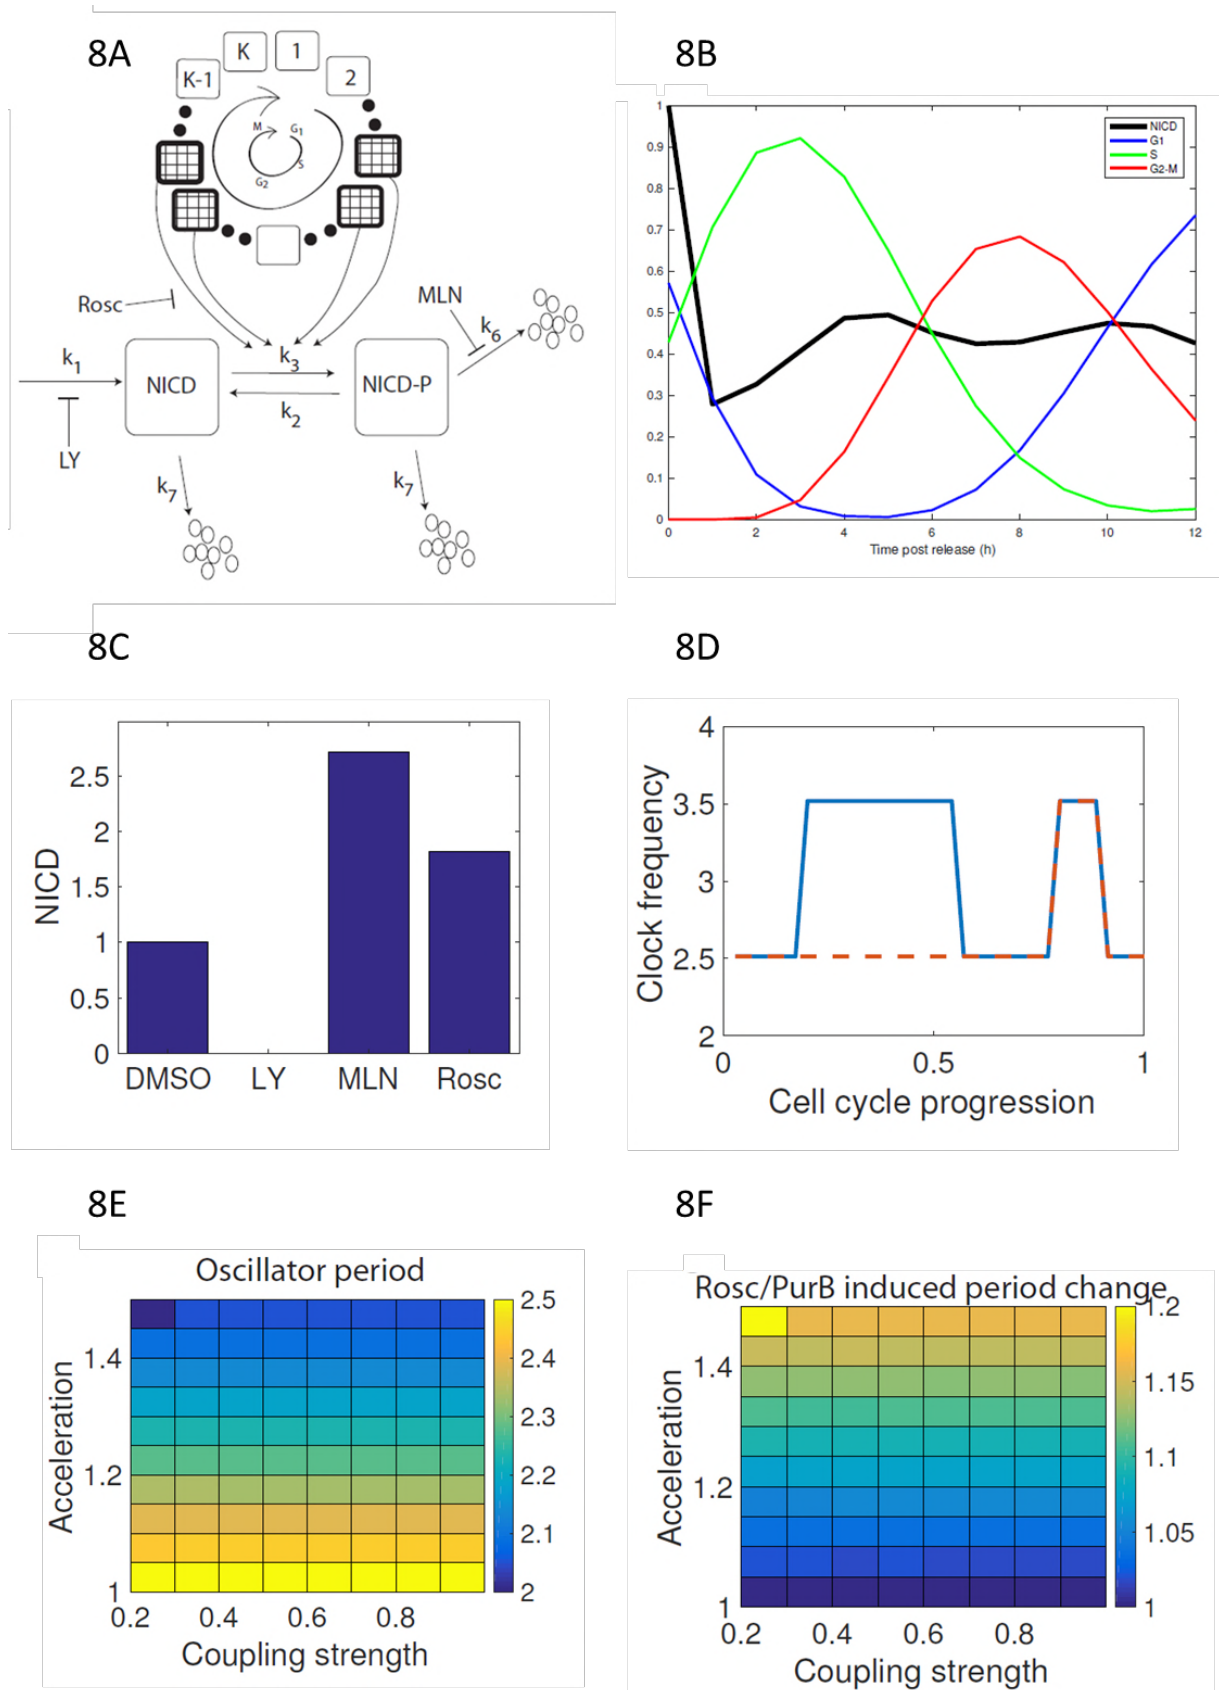

749

750

751 **Figure 8. Mathematical model links NICD regulation, segmentation clock and cell cycle.**  
752 (A) A schematic illustration of NICD production, phosphorylation and cell-cycle coupled  
753 degradation. The cell cycle is represented by clockwise progression through a  $K$  state model.  
754 NICD phosphorylation occurs at two different stages of the cell cycle (patterned boxes). (B)  
755 Levels of NICD and cell cycle phase distribution are plotted against time post thymidine  
756 release. (C) Steady-state levels of NICD are plotted for simulated control, LY411575,  
757 MLN4924 and Purvalanol B/Roscovitine treatments. (D, E, F) Simulating a population of  
758 coupled PSM oscillators with cell cycle modulated frequencies. (D) The clock frequency in a  
759 single cell is plotted against cell cycle position for normal (solid line) and CDK2 inhibited  
760 (dashed line) cells. (E) The emergent population-scale oscillator period is plotted against  
761 coupling strength and CDK acceleration factor. (F) Period change (Roscovitine/Purvalanol B  
762 versus control) as a result of CDK inhibition is plotted against coupling strength and CDK-  
763 mediated acceleration rate.



764 **Supplementary Figure 1**

A

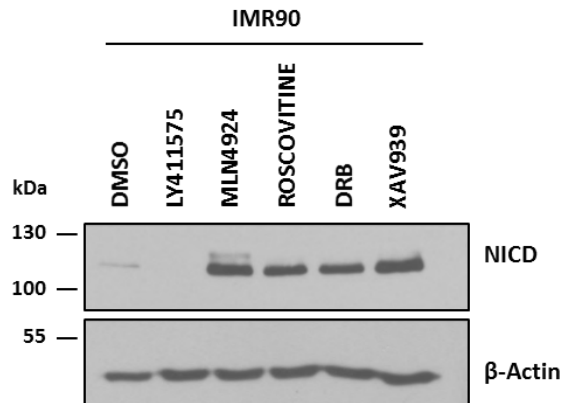

B

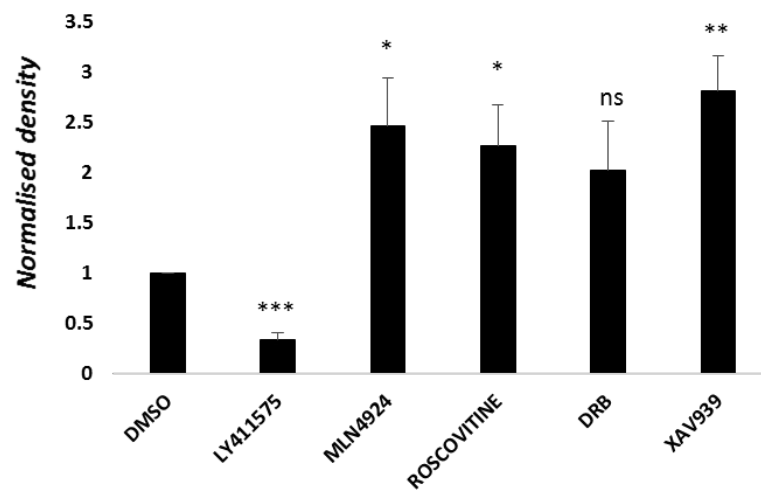

765

766

767 **Supplementary Figure 1. Exposure to Roscovitine, DRB or XAV9393 leads to increased**

768 **levels of NICD in IMR90 cells.** (A) IMR90 cells were treated for 3 hours with 150 nM of

769 LY411575, 1 µM of MLN4924, 10 µM of Roscovitine, 10 µM DRB or 10 µM XAV939. DMSO

770 served as vehicle control. Western blot analysis reveals that NICD levels were increased upon

771 treatment with Roscovitine, DRB, XAV939, and MLN4924. NICD is undetectable following

772 LY411575 treatment. beta-actin served as loading control.

773 (B) Quantification of the density of western blot bands in (A) using ImageJ software. Data are

774 expressed as fold changes compared to DMSO. All data represent the mean ± SEM from

775 three independent experiments. Student's t-test analysis was performed, with \* $p \leq 0.05$ ,  
776 \*\* $p \leq 0.01$ , and \*\*\* $p \leq 0.001$ .

777 **Supplementary Figure 2**

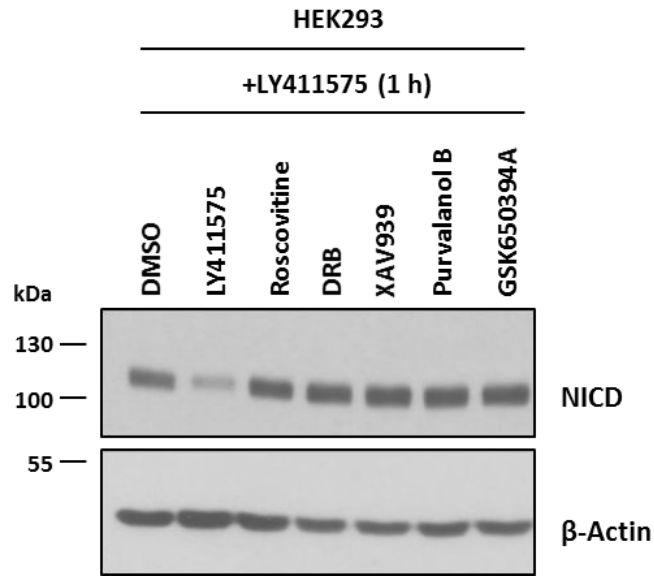

778

779

780 **Supplementary Figure 2. Increase in endogenous NICD levels after exposure to small**  
781 **molecule inhibitors is due to increased stability, not increased NICD production.**

782 HEK293 cells were treated for 3 hours with 150 nM of LY411575, 10  $\mu$ M of Roscovitine, 10  
783  $\mu$ M of DRB, 10  $\mu$ M of XAV939, 0.1  $\mu$ M of Purvalanol B or 10  $\mu$ M of GSK650394A. DMSO  
784 served as vehicle control. 1 hour prior to lysate collection 150 nM of LY411575 was added to  
785 DMSO, Roscovitine, DRB, XAV939, Purvalanol B or GSK650394A treated cells to prevent  
786 new NICD production.  $\beta$ -Actin served as loading control.

787 **Supplementary Figure 3**

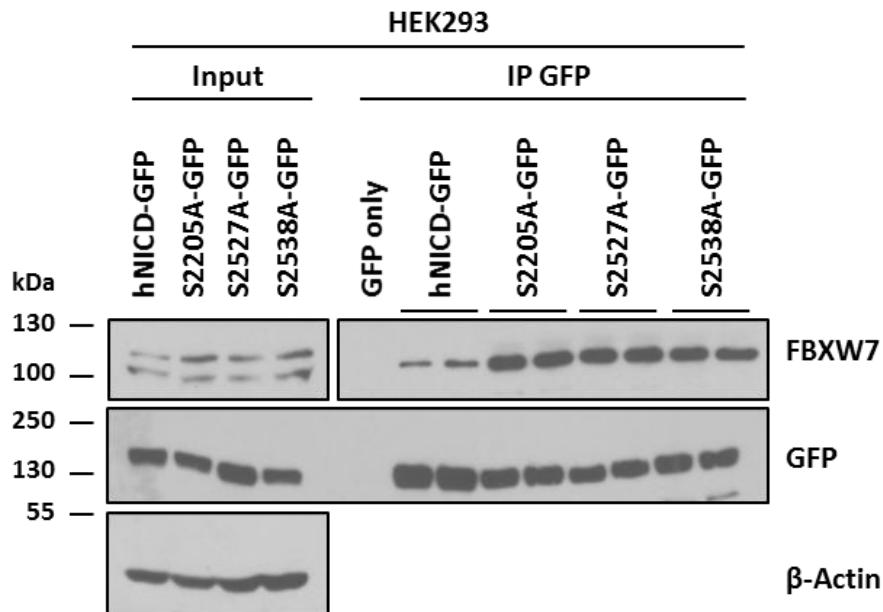

788

789

790

791 **Supplementary Figure 3. Serine to alanine point mutation on NICD Serine 2205, 2527**

792 **and 2538 residues do not change interaction with FBXW7.** hNICD-GFP peptides encoding

793 non-phosphorylatable mutations (serine to alanine) were expressed in HEK293 cells. The

794 exogenously expressed protein was subsequently immunoprecipitated with anti-GFP antibody

795 and precipitated material was analysed by western blot using FBXW7 antibody. Wild-type

796 hNICD-GFP and GFP only vectors were included as positive and negative controls,

797 respectively. Western blot using GFP antibody served as immunoprecipitation efficiency

798 control. β-Actin has been used as loading control.

799 **Supplementary Figure 4**

A

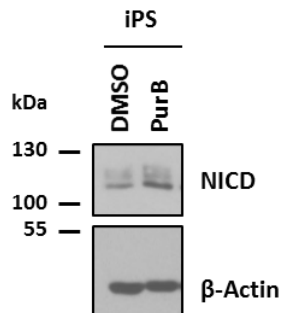

B

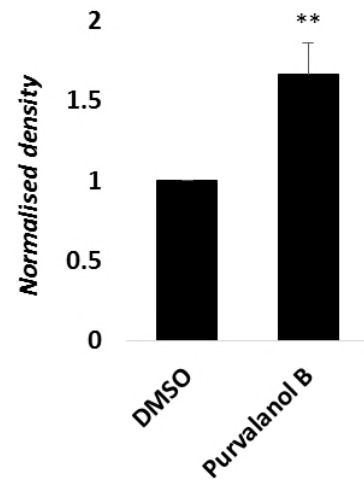

800

801

802 **Supplementary Figure 4. NICD levels increase in iPS cells following treatment with**  
803 **Purvalanol B.** (A) iPS cells were treated with 0.1 $\mu$ M of Purvalanol B for 3 hours. Endogenous  
804 levels of NICD were detected by western blot.  $\beta$ -Actin has been used as loading control.  
805 (B) Quantification of the density of western blot bands in (A) using ImageJ software. Data are  
806 expressed as fold changes compared to DMSO. All data represent the mean  $\pm$  SEM from  
807 three independent experiments. Student's t-test analysis was performed, with \*\*p $\leq$ 0.01.

## 808 MATERIALS AND METHODS

809

810 All plasmids and reagents indicated as such in the text are available from MRC PPU Reagents  
811 and Services (<https://mrcppureagents.dundee.ac.uk/>)

812

### 813 Cell Culture

814 HEK293 (human embryo kidney cells) and IMR90 (Human Caucasian fetal lung fibroblast)  
815 cells were obtained from the American Type Culture Collection (ATCC). Cells were routinely  
816 cultured and maintained in DMEM High glucose (Gibco) supplemented with 10% Fetal Bovine  
817 Serum (FBS; LabTech), 1% Penicillin/Streptomycin (Gibco), 1% Sodium Pyruvate (Gibco) and  
818 2mM L-Glutamine (Gibco).

819 ChiPS4 human Induced pluripotent stem (iPS) cells (derived from new born human dermal  
820 fibroblasts) were purchased from Cellartis AB and maintained using DEF-CS (Cellartis AB)  
821 according to the manufacturer's recommendations. For experiments, cells were seeded as  
822 single cells on Geltrex™ coated dishes (10 µg/cm<sup>2</sup>) in DEF medium supplemented with 10 µM  
823 of Rho-kinase inhibitor Y27632 (Tocris) at a density of 1x54 cells/cm<sup>2</sup> and allowed to attach  
824 overnight. The medium was then replaced with fresh DEF medium (Y27632) and after a further  
825 24 hrs cells were treated with inhibitors.

826 All cells were grown at 37°C in 5% CO<sub>2</sub>.

827 Cells were trypsinized and split into new plates at subconfluency.

828

### 829 Transfections

#### 830 Overexpression transfections

831 HEK293 cells were seeded 24 hrs prior to transfection and then transiently transfected  
832 following the GeneJuice® Transfection Reagent protocol provided by Merck Millipore.  
833 Depending on plate size, 2-9 µg of plasmid was used. Cells were harvested 24 hrs after  
834 transfection.

835

836 **siRNA transfections**

837 Small interfering RNA oligonucleotides were purchased from MWG/Eurofins and used in a  
838 stock concentration of 20 $\mu$ M. siRNAs were transfected using calcium phosphate transfection  
839 method [83]. siRNA oligonucleotides were diluted in a solution containing distilled sterile H<sub>2</sub>O  
840 and 2M CaCl<sub>2</sub>.

841 The mixture was then added drop-wise to a round-bottom 15ml tube containing 2X HBS  
842 (0.137M NaCl, 0.75M Na<sub>2</sub>HPO<sub>4</sub>, 20mM HEPES pH 7.0). The content was then added to cells  
843 and incubated overnight at 37°C. Media was changed after 24 hrs and cells were harvested  
844 after 48 hrs of transfection.

845

846 **Oligonucleotide Sequences for siRNA Knockdown siRNA**

| siRNA          | Sequence (5'→3')      |
|----------------|-----------------------|
| <b>Control</b> | AACAGUCGCGUUUGCGACUGG |
| <b>CDK1</b>    | AAGGGGUUCCUAGUACUGCAA |
| <b>CDK2</b>    | CCUCAGAAUCUGCUUAUUA   |
| <b>FBXW7</b>   | ACAGGACAGUGUUUACAAA   |

847

848 Commercial CDK8 siRNA (Cell Signalling, #6438) has been used.

849

850 **Plasmids and mutagenesis**

851 hNICD-GFP vector was generated and obtained from MRC-PPU reagents, University of  
852 Dundee. All NOTCH1 mutants were generated and obtained from MRC-PPU reagents,  
853 University of Dundee.

854 Briefly, the fragment NOTCH1 1754-2555 (end) was synthesized by GeneArt with flanking  
855 BamHI and NotI restriction sites to facilitate cloning, the sequence was codon-optimized for  
856 mammalian expression. This was then digested and ligated into expression vector pCMV5D  
857 GFP to make the wild type clone pCMV5D GFP NOTCH1 1754-end.

858 Site-directed mutagenesis was carried out using the QuikChange Lightning Site-Directed  
859 Mutagenesis Kit (Agilent Technologies) but substituting the Taq with KOD Hot Start DNA  
860 polymerase (Novagen). All mutations were confirmed by sequencing.

861

862 S2205A change was introduced using primers

863 Forward: 5'-CCCGTGGATAGCCTGGAAGCGCCTCACGGCTACCTGAGC

864 Reverse: 5'-GCTCAGGTAGCCGTGAGGCGCTTCCAGGCTATCCACGGG

865

866 S2513A change was introduced using primers:

867 Forward: 5'-CCCATTTCTGACCCCTGCACCCGAGAGCCCCGATC

868 Reverse: 5'-ATCGGGGCTCTCGGGTGCAGGGGTCAGAAATGGG

869

870 S2516A change was introduced using primers

871 Forward: 5'-CTGACCCCTAGCCCCGAGGCGCCCGATCAGTGGTCTAGC

872 Reverse: 5'-GCTAGACCACTGATCGGGCGCCTCGGGGCTAGGGGTCAG

873

874 S2513A and S2516A double mutant was generated with primers:

875 Forward: 5'-CACCCCTTCCTCACCCCGGCCCTGAGGCCCTGACCAGTGGTCCA

876 Reverse: 5'-TGGACCACTGGTCAGGGGCCTCAGGGGCCGGGTGAGGAAGGGGTG

877

878 S2527A change was introduced using primers

879 Forward: 5'-TCTAGCAGCAGCCCCACGCGAACGTGTCCGATTGGAGC

880 Reverse: 5'-GCTCCAATCGGACACGTTTCGCGTGGGGGCTGCTGCTAGA

881

882 S2538A change was introduced using primers

883 Forward: 5'-TGGAGCGAAGGCGTGTCCGCCCCCAACCAGCATGCAG

884 Reverse: 5'-CTGCATGCTGGTTGGGGGGCGGACACGCCTTCGCTCCA

885



## 886 **Treatments**

887 Cells were treated for 3 hrs with different drugs: 150 nM of LY411575 (generated in house,  
888 University of Dundee) [9], 1µM of MLN4924 (MRC-PPU reagents, University of Dundee), 10  
889 µM of 5,6-Dichloro-1-beta-D-ribofuranosylbenzimidazole (DRB) (Sigma), 10 µM of  
890 Roscovitine (Calbiochem), 10 µM of XAV939 (Tocris Bioscience), 0.1 µM of Purvalanol B  
891 (MRC-PPU reagents, University of Dundee), 10 µM of GSK650394A (MRC-PPU reagents,  
892 University of Dundee), 10 µM of RO-3306 (Sigma) and DMSO (Sigma) as control.

893 Lysates were treated with λ-phosphatase (New England BioLabs) following the manufacturer's  
894 instructions.

895

## 896 **Protein extraction**

897 Cells were lysed on ice for 15 min by adding the appropriate volume of lysis buffer (50mM  
898 Tris-HCl pH 7.5, 150mM NaCl, 1mM EDTA, 1mM EGTA, 10mM NaF, 1mM Na<sub>3</sub>VO<sub>4</sub>, 0.1% β-  
899 mercaptoEtOH, 1 tablet of protease inhibitor cocktail, Thermo Scientific).

900 Cells were harvested by scraping and the lysate was clarified by centrifugation for 15 min at  
901 14000 rcf at 4°C. The supernatants were collected and stored at -80°C.

902 Bradford reagent (BioRad) has been used as the colorimetric assay for protein measurements.

903

## 904 **Western Blot**

905 20 to 50µg of protein were diluted 1:1 with 2x loading buffer (100mM Tris HCL pH 6.8, 20%  
906 glycerol, 4% SDS, 200mM DTT and Bromophenol Blue) and proteins were denatured for 5  
907 mins at 95°C. Samples were resolved on a SDS-PAGE following standard procedures.

908 Gels were transferred onto Nitrocellulose membrane (GE Healthcare) for 1.5 hrs at 400mA.

909 The membrane was then blocked with 5% Milk in TBS-tween buffer (20mM Tris pH 7.6,  
910 150mM NaCl, 0.1% Tween) for 20 minutes. Membranes were incubated 30 minutes/1 hour or  
911 O/N at 4°C in primary antibodies.

912 Antibodies and dilutions are shown in **Table 2**.

913 The membranes were then washed with TBS-Tween and incubated with the appropriate  
914 secondary HRP antibody (Cell Signalling, #7074, #7076). After washing, membranes were  
915 developed using ECL solution (Pierce).

916

917 **Table 2.**

| <b>Antibody</b>    | <b>Species</b> | <b>Dilution</b> | <b>Manufactured</b>     |
|--------------------|----------------|-----------------|-------------------------|
| Cleaved Notch1     | <i>Rabbit</i>  | 1:1000          | Cell Signalling #4147   |
| $\beta$ -Actin     | <i>Mouse</i>   | 1:10000         | Proteintech #66009-1-Ig |
| Fbxw7              | <i>Rabbit</i>  | 1:1000          | Abcam #171961           |
| GFP                | <i>Mouse</i>   | 1:1000          | Cell Signalling #2956   |
| Cdk1               | <i>Rabbit</i>  | 1:1000          | Cell Signalling #9116   |
| Cdk2               | <i>Rabbit</i>  | 1:1000          | Cell Signalling #2546   |
| Cdk4               | <i>Rabbit</i>  | 1:1000          | Santa Cruz #260         |
| Cdk6               | <i>Rabbit</i>  | 1:1000          | Santa Cruz #177         |
| Cdk8               | <i>Rabbit</i>  | 1:1000          | Bethyl #A302-501A-T     |
| Cyclin A2          | <i>Mouse</i>   | 1:1000          | Cell Signalling #4656   |
| Cyclin B1          | <i>Rabbit</i>  | 1:1000          | Cell Signalling #4138   |
| Cyclin C           | <i>Rabbit</i>  | 1:1000          | Bethyl #A301-989A-M     |
| Cyclin D1          | <i>Rabbit</i>  | 1:5000          | Abcam #137875           |
| Cyclin E1          | <i>Mouse</i>   | 1:1000          | Cell Signalling #4129   |
| Total Histone H3   | <i>Rabbit</i>  | 1:1000          | Cell Signalling #9715   |
| Phospho Histone H3 | <i>Rabbit</i>  | 1:1000          | Cell Signalling #3377   |

918

### 919 **Immunoprecipitation**

920 200ug to 1 mg of proteins were incubated O/N at 4°C on rotation with 2  $\mu$ g of Fbxw7 antibody  
921 (Bethyl, A301-721A). Rabbit IgG was used as negative control. Protein G Agarose beads (Cell  
922 Signalling #37478) were added for 2 hrs at 4°C on rotation. Precipitates were washed 3 times

923 with cold PBS before adding 2x loading buffer. Samples were denatured for 5 mins at 95°C  
924 and then analysed by Western Blot.

925 Immunoprecipitation using GFP-Trap®\_A beads (ChromoTek) was performed according to  
926 the manufacturer's instructions.

927

### 928 **Phos-tag gel**

929 Prior loading into the gels for Phos-tag SDS-PAGE, samples were supplemented with 10 mM  
930 MnCl<sub>2</sub>. Phos-tag SDS-PAGE was carried out as previously described [62, 84]. After  
931 electrophoresis, gels were washed three times for 10 min each in the transfer buffer [48 mM  
932 Tris/HCl, 39 mM glycine and 20% (v/v) methanol] containing 10 mM EDTA and 0.05% (w/v)  
933 SDS, followed by one wash in the transfer buffer containing 0.05% SDS for 10 min. Proteins  
934 were transferred and incubated with specific antibodies as previously described.

935

### 936 **Mass Spectrometry**

937 Upon separation by SDS-PAGE on NuPAGE™ 4-12% Bis-Tris protein gels (Thermo  
938 Scientific) and staining with Instant Blue (Expedeon), protein bands were excised from gels.  
939 Samples were reduced with 10mM DTT at 50°C for 30 min and alkylated with 100mM IAA at  
940 room temperature for 20 min in the dark.

941 Digestion was carried out by adding sequencing grade chymotrypsin (Sigma) at a ratio of 1 to  
942 50 (enzyme to substrate) and incubating O/N at 30°C.

943 Peptides were extracted with 100% ACN containing 2.5% formic acid and dried in a vacuum  
944 centrifuge.

945 Mass spectrometric analysis was performed by LC-MS-MS using a linear ion trap-orbitrap  
946 hybrid mass spectrometer (LTQ-Orbitrap Velos, Thermo Fisher Scientific) and coupled to a  
947 Dionex Ultimate 3000 nanoLC system. Peptides were typically injected onto a Thermo  
948 Scientific 15cm Easy spray column (Part No. ES800), with a flow of 300 nl/min and eluted over  
949 a 40 min linear gradient of 97% solvent A (3% DMSO, 2% Acetonitrile, 0.1% formic acid in  
950 H<sub>2</sub>O) to 35% solvent B (90% acetonitrile, 3% DMSO, 0.08% formic acid in H<sub>2</sub>O). Data files

951 were analysed by Proteome Discoverer 2.0 (Thermo), using Mascot 2.4.1  
952 ([www.matrixscience.com](http://www.matrixscience.com)), and searching against the Swissprot and MRC-PPU (University of  
953 Dundee) databases. Scaffold ([www.ProteomeSoftware.com](http://www.ProteomeSoftware.com)) was also used to examine the  
954 Mascot result files. Allowance was made for the following modifications: fixed,  
955 Carbamidomethyl (C), and variable, Oxidation (M), Dioxidation (M) and Phosphorylation (S, T  
956 and Y). Error tolerances were 10ppm for MS1 and 0.6 Da for MS2. Phospho-sites were  
957 assigned according to Proteome Discoverer ptmRS when the phospho-RS site probability was  
958 greater than or equal to 90%.

959

#### 960 **Kinase assay**

961 Kinase assay was designed and performed by MRC-PPU International centre for Kinase  
962 Profiling at University of Dundee (<http://www.kinase-screen.mrc.ac.uk/>). All assays were  
963 carried out using a radioactive (<sup>33</sup>P-ATP) filter-binding assay.

964

#### 965 **Fluorescence-Activated Cell Sorter Analysis**

966 HEK293 cells were harvested, pelleted by gentle centrifugation (450g x 5 min) and washed  
967 once in 1 ml of PBS+1% v/v FBS and transferred to FACS tubes (Scientific Laboratory  
968 Supplies).

969 Cells were pelleted again and then fixed in cold 70% ethanol for 30 minutes at room  
970 temperature.

971 Cells number was adjusted to approximately  $5 \times 10^5$  cells and then cells were washed twice in  
972 PBS+1% v/v FBS.

973 Cell pellet was then resuspended in 300  $\mu$ l of staining buffer (50  $\mu$ g/ml Propidium iodide, 50  
974  $\mu$ g/ml RNase A in PBS+1% v/v FBS) and incubated for 30 min in the dark at room temperature.

975 FACS analyses were conducted by Flow Cytometry and Cell Sorting facility (University of  
976 Dundee).

977 Briefly, samples were analyzed on a FACS Canto II flow cytometer from Becton Dickinson.

978 Propidium Iodine was detected using 488nm excitation and emission collected at 587 +/- 40

979 nm. Data were analyzed using Flowjo software (Flowjo, LLC). Single cells were identified on  
980 the basis of PI-A and PI-W measurements and doublets excluded. Cell cycle distribution of  
981 the resulting PI-A histograms were determined using the Watson-Pragmatic model.

982

### 983 **Cell cycle synchronization**

984 To synchronize HEK293 cells at G1/S, a double-thymidine block assay was performed. Cells  
985 were treated with 2.5 mM of thymidine (Sigma) for 18 hrs, washed twice with PBS, released  
986 into fresh media for 9 hrs, treated for a further 14 hrs with 2.5mM of thymidine, then released  
987 again into fresh media following two washes in PBS. Cells were then collected for FACS and  
988 Western Blot protein analyses at the indicated time points, following protocols already  
989 described.

990

### 991 **Mouse Embryo Explant Culture**

992 E10.5 CD1 mice embryos were harvested and explants were prepared as previously  
993 described [85]. Each embryo's posterior part was divided into two halves by cutting along the  
994 neural tube. The explants were cultured in hanging drops of culture medium composed of  
995 DMEM/F12 (Gibco), 10% FBS, 1% penicillin–streptomycin, 10 ng/ml Fgf2 (PeproTech).

996 One half was cultured in medium containing Purvalanol B (1  $\mu$ M) or RO-3306 (10  $\mu$ M),  
997 whereas the control side was cultured in normal medium (DMSO). Both sides were cultured  
998 for 4 hr and then analysed for expression of *Lfng* mRNA by in situ hybridization.

999 For the Western Blot analysis PSM explants from 5 embryos were cultured in DMSO control  
1000 vehicle and the corresponding contralateral 5 PSM explants cultured in the presence of a small  
1001 molecule inhibitor.

1002 Experiments were conducted in strict adherence to the Animals (Scientific Procedures) Act of  
1003 1986 and UK Home Office Codes of Practice for use of animals in scientific procedures.

1004

### 1005 **In situ hybridisation of PSM explants using exonic RNA probes**

1006 For whole-mount embryos and explants, in situ hybridisation analysis was performed with the  
1007 use of exonic anti-sense RNA probes as previously described [86].

1008 Samples were imaged using a Leica bright field dissection microscope using Volocity  
1009 acquisition software. The number of somites present in each explant (identical between  
1010 explant pairs but variable between embryos) was recorded.

1011 To fix the tissue, samples were incubated for 2 hrs at RT in 4 % PFA/PBS, washed copiously  
1012 in PBST and transferred into sealed Eppendorf tubes containing 0.01 % sodium azide/PBS  
1013 for long-term storage at 4°C.

1014

### 1015 **Statistical Analysis**

1016 Unless indicated, Statistical analyses were performed using GraphPad software.

1017 Student t-tests were performed in all the data comparing control to treatment conditions, with

1018 P values calculated as \*  $p \leq 0.05$ , \*\*  $p \leq 0.01$  and \*\*\*  $p \leq 0.001$ . All experiments have been

1019 performed at least three times.

1020 **ACKNOWLEDGEMENTS**

1021 We would like to thank Ioanna Mastromina and Michaela Omelkova for reading of the  
1022 manuscript and constructive feedbacks. Special thanks also go to Genta Ito for assistance  
1023 with Phostag gel assay. We thank the groups of D. Alessi and S. Rocha for reagents and  
1024 Laura D'Ignazio for experimental assistance. The authors would like to thank Rachel Toth, Mel  
1025 Wightman and Tom Macartney (MRC-PPU Reagents and Services) for cloning and Dr David  
1026 Campbell, Bob Gourlay and Joby Vhargese (MRC-PPU) for Mass Spectrometry analysis. We  
1027 also thank Professor Daan van Aalten, Professor Victoria Cowling, Dr Francesca Tonelli and  
1028 Dr Houjiang Zhou for their input.

1029

1030 **COMPETING INTERESTS**

1031 I can confirm there are no competing interests for any of the named authors.

1032 REFERENCES

- 1033 1. Maroto, M., R.A. Bone, and J.K. Dale, *Somitogenesis*. Development, 2012. **139**(14):  
1034 p. 2453-2456.
- 1035 2. Gomez, C. and O. Pourquie, *Developmental control of segment numbers in*  
1036 *vertebrates*. J Exp Zool B Mol Dev Evol, 2009. **312**(6): p. 533-44.
- 1037 3. Hubaud, A. and O. Pourquie, *Signalling dynamics in vertebrate segmentation*. Nat Rev  
1038 Mol Cell Biol, 2014. **15**(11): p. 709-21.
- 1039 4. Gossler, A. and M. Hrabe de Angelis, *Somitogenesis*. Curr Top Dev Biol, 1998. **38**: p.  
1040 225-87.
- 1041 5. Dequeant, M.L., et al., *A complex oscillating network of signaling genes underlies the*  
1042 *mouse segmentation clock*. Science, 2006. **314**(5805): p. 1595-8.
- 1043 6. Gibb, S., M. Maroto, and J.K. Dale, *The segmentation clock mechanism moves up a*  
1044 *notch*. Trends Cell Biol, 2010. **20**(10): p. 593-600.
- 1045 7. Pourquie, O., *Vertebrate segmentation: from cyclic gene networks to scoliosis*. Cell,  
1046 2011. **145**(5): p. 650-63.
- 1047 8. Sparrow, D.B., et al., *A mechanism for gene-environment interaction in the etiology of*  
1048 *congenital scoliosis*. Cell, 2012. **149**(2): p. 295-306.
- 1049 9. Ferjentsik, Z., et al., *Notch is a critical component of the mouse somitogenesis*  
1050 *oscillator and is essential for the formation of the somites*. PLoS Genet, 2009. **5**(9): p.  
1051 e1000662.
- 1052 10. Jiang, Y.J., et al., *Notch signalling and the synchronization of the somite segmentation*  
1053 *clock*. Nature, 2000. **408**(6811): p. 475-9.
- 1054 11. Hubaud, A., et al., *Excitable Dynamics and Yap-Dependent Mechanical Cues Drive*  
1055 *the Segmentation Clock*. Cell, 2017. **171**(3): p. 668-682 e11.
- 1056 12. Delaune, E.A., et al., *Single-cell-resolution imaging of the impact of Notch signaling*  
1057 *and mitosis on segmentation clock dynamics*. Dev Cell, 2012. **23**(5): p. 995-1005.
- 1058 13. Liao, B.K. and A.C. Oates, *Delta-Notch signalling in segmentation*. Arthropod Struct  
1059 Dev, 2017. **46**(3): p. 429-447.
- 1060 14. Lewis, J., *Autoinhibition with transcriptional delay: a simple mechanism for the*  
1061 *zebrafish somitogenesis oscillator*. Curr Biol, 2003. **13**(16): p. 1398-408.
- 1062 15. Monk, N.A., *Oscillatory expression of Hes1, p53, and NF-kappaB driven by*  
1063 *transcriptional time delays*. Curr Biol, 2003. **13**(16): p. 1409-13.
- 1064 16. Ay, A., et al., *Short-lived Her proteins drive robust synchronized oscillations in the*  
1065 *zebrafish segmentation clock*. Development, 2013. **140**(15): p. 3244-53.
- 1066 17. Hanisch, A., et al., *The elongation rate of RNA polymerase II in zebrafish and its*  
1067 *significance in the somite segmentation clock*. Development, 2013. **140**(2): p. 444-53.
- 1068 18. Wiedermann, G., et al., *A balance of positive and negative regulators determines the*  
1069 *pace of the segmentation clock*. Elife, 2015. **4**: p. e05842.
- 1070 19. Harima, Y., et al., *Accelerating the tempo of the segmentation clock by reducing the*  
1071 *number of introns in the Hes7 gene*. Cell Rep, 2013. **3**(1): p. 1-7.
- 1072 20. Liao, B.K., D.J. Jorg, and A.C. Oates, *Faster embryonic segmentation through*  
1073 *elevated Delta-Notch signalling*. Nat Commun, 2016. **7**: p. 11861.
- 1074 21. Schroter, C. and A.C. Oates, *Segment number and axial identity in a segmentation*  
1075 *clock period mutant*. Curr Biol, 2010. **20**(14): p. 1254-8.
- 1076 22. Herrgen, L., et al., *Intercellular coupling regulates the period of the segmentation clock*.  
1077 Curr Biol, 2010. **20**(14): p. 1244-53.
- 1078 23. Kim, W., et al., *The period of the somite segmentation clock is sensitive to Notch*  
1079 *activity*. Mol Biol Cell, 2011. **22**(18): p. 3541-9.
- 1080 24. Nowell, C.S. and F. Radtke, *Notch as a tumour suppressor*. Nature Reviews Cancer,  
1081 2017. **17**(3): p. 145-159.
- 1082 25. Koch, U., R. Lehal, and F. Radtke, *Stem cells living with a Notch*. Development, 2013.  
1083 **140**(4): p. 689-704.
- 1084 26. Lai, E.C., *Notch signaling: control of cell communication and cell fate*. Development,  
1085 2004. **131**(5): p. 965-73.



- 1086 27. Artavanis-Tsakonas, S., M.D. Rand, and R.J. Lake, *Notch signaling: cell fate control*  
1087 *and signal integration in development*. Science, 1999. **284**(5415): p. 770-6.
- 1088 28. Penton, A.L., L.D. Leonard, and N.B. Spinner, *Notch signaling in human development*  
1089 *and disease*. Semin Cell Dev Biol, 2012. **23**(4): p. 450-7.
- 1090 29. Lowell, S., et al., *Notch promotes neural lineage entry by pluripotent embryonic stem*  
1091 *cells*. PLoS Biol, 2006. **4**(5): p. e121.
- 1092 30. Kopan, R. and M.X. Ilagan, *The canonical Notch signaling pathway: unfolding the*  
1093 *activation mechanism*. Cell, 2009. **137**(2): p. 216-33.
- 1094 31. Kovall, R.A., et al., *The Canonical Notch Signaling Pathway: Structural and*  
1095 *Biochemical Insights into Shape, Sugar, and Force*. Dev Cell, 2017. **41**(3): p. 228-241.
- 1096 32. Carrieri, F.A. and J.K. Dale, *Turn It Down a Notch*. Front Cell Dev Biol, 2016. **4**: p. 151.
- 1097 33. Kovall, R.A., et al., *The Canonical Notch Signaling Pathway: Structural and*  
1098 *Biochemical Insights into Shape, Sugar, and Force*. Developmental Cell, 2017. **41**(3):  
1099 p. 228-241.
- 1100 34. Espinosa, L., et al., *Phosphorylation by glycogen synthase kinase-3 beta down-*  
1101 *regulates Notch activity, a link for Notch and Wnt pathways*. J Biol Chem, 2003.  
1102 **278**(34): p. 32227-35.
- 1103 35. Fryer, C.J., J.B. White, and K.A. Jones, *Mastermind recruits CycC:CDK8 to*  
1104 *phosphorylate the Notch ICD and coordinate activation with turnover*. Mol Cell, 2004.  
1105 **16**(4): p. 509-20.
- 1106 36. Jin, Y.H., et al., *Regulation of Notch1/NICD and Hes1 expressions by GSK-*  
1107 *3alpha/beta*. Mol Cells, 2009. **27**(1): p. 15-9.
- 1108 37. O'Neil, J., et al., *FBW7 mutations in leukemic cells mediate NOTCH pathway activation*  
1109 *and resistance to gamma-secretase inhibitors*. The Journal of Experimental Medicine, 2007.  
1110 **204**(8): p. 1813-1824.
- 1111 38. Nowell, C. and F. Radtke, *Cutaneous Notch signaling in health and disease*. Cold  
1112 Spring Harb Perspect Med, 2013. **3**(12): p. a017772.
- 1113 39. Roy, M., W.S. Pear, and J.C. Aster, *The multifaceted role of Notch in cancer*. Curr Opin  
1114 Genet Dev, 2007. **17**(1): p. 52-9.
- 1115 40. Weng, A.P., et al., *Activating mutations of NOTCH1 in human T cell acute*  
1116 *lymphoblastic leukemia*. Science, 2004. **306**(5694): p. 269-71.
- 1117 41. Wang, K., et al., *PEST domain mutations in Notch receptors comprise an oncogenic*  
1118 *driver segment in triple-negative breast cancer sensitive to a gamma-secretase*  
1119 *inhibitor*. Clin Cancer Res, 2015. **21**(6): p. 1487-96.
- 1120 42. Bolos, V., et al., *Notch activation stimulates migration of breast cancer cells and*  
1121 *promotes tumor growth*. Breast Cancer Res, 2013. **15**(4): p. R54.
- 1122 43. Crusio, K.M., et al., *The ubiquitous nature of cancer: the role of the SCF(Fbw7)*  
1123 *complex in development and transformation*. Oncogene, 2010. **29**(35): p. 4865-73.
- 1124 44. O'Neil, J., et al., *FBW7 mutations in leukemic cells mediate NOTCH pathway activation*  
1125 *and resistance to gamma-secretase inhibitors*. J Exp Med, 2007. **204**(8): p. 1813-24.
- 1126 45. Davis, R.J., M. Welcker, and B.E. Clurman, *Tumor suppression by the Fbw7 ubiquitin*  
1127 *ligase: mechanisms and opportunities*. Cancer Cell, 2014. **26**(4): p. 455-64.
- 1128 46. Wu, G., et al., *SEL-10 is an inhibitor of notch signaling that targets notch for ubiquitin-*  
1129 *mediated protein degradation*. Mol Cell Biol, 2001. **21**(21): p. 7403-15.
- 1130 47. Oberg, C., et al., *The Notch intracellular domain is ubiquitinated and negatively*  
1131 *regulated by the mammalian Sel-10 homolog*. J Biol Chem, 2001. **276**(38): p. 35847-  
1132 53.
- 1133 48. Gupta-Rossi, N., et al., *Functional interaction between SEL-10, an F-box protein, and*  
1134 *the nuclear form of activated Notch1 receptor*. J Biol Chem, 2001. **276**(37): p. 34371-  
1135 8.
- 1136 49. Skaar, J.R., J.K. Pagan, and M. Pagano, *Mechanisms and function of substrate*  
1137 *recruitment by F-box proteins*. Nat Rev Mol Cell Biol, 2013. **14**(6): p. 369-81.
- 1138 50. Hao, B., et al., *Structure of a Fbw7-Skp1-cyclin E complex: multisite-phosphorylated*  
1139 *substrate recognition by SCF ubiquitin ligases*. Mol Cell, 2007. **26**(1): p. 131-43.

- 1140 51. Wagner, S.A., et al., *Proteomic analyses reveal divergent ubiquitylation site patterns*  
1141 *in murine tissues*. Mol Cell Proteomics, 2012. **11**(12): p. 1578-85.
- 1142 52. Kim, W., et al., *Systematic and quantitative assessment of the ubiquitin-modified*  
1143 *proteome*. Mol Cell, 2011. **44**(2): p. 325-40.
- 1144 53. Moretti, J. and C. Brou, *Ubiquitinations in the notch signaling pathway*. Int J Mol Sci,  
1145 2013. **14**(3): p. 6359-81.
- 1146 54. Cicenias, J., et al., *Roscovotine in cancer and other diseases*. Annals of Translational  
1147 Medicine, 2015. **3**(10).
- 1148 55. MacCallum, D.E., et al., *Seliciclib (CYC202, R-Roscovotine) induces cell death in*  
1149 *multiple myeloma cells by inhibition of RNA polymerase II-dependent transcription and*  
1150 *down-regulation of Mcl-1*. Cancer Res, 2005. **65**(12): p. 5399-407.
- 1151 56. Yankulov, K., et al., *The transcriptional elongation inhibitor 5,6-dichloro-1-beta-D-*  
1152 *ribofuranosylbenzimidazole inhibits transcription factor IIH-associated protein kinase*.  
1153 J Biol Chem, 1995. **270**(41): p. 23922-5.
- 1154 57. Turinetto, V., et al., *The cyclin-dependent kinase inhibitor 5, 6-dichloro-1-beta-D-*  
1155 *ribofuranosylbenzimidazole induces nongenotoxic, DNA replication-independent*  
1156 *apoptosis of normal and leukemic cells, regardless of their p53 status*. BMC Cancer,  
1157 2009. **9**: p. 281.
- 1158 58. Huang, S.-M.A., et al., *Tankyrase inhibition stabilizes axin and antagonizes Wnt*  
1159 *signalling*. Nature, 2009. **461**: p. 614.
- 1160 59. Luistro, L., et al., *Preclinical Profile of a Potent  $\gamma$ -Secretase Inhibitor Targeting Notch*  
1161 *Signaling with *In vivo* Efficacy and Pharmacodynamic Properties*. Cancer  
1162 Research, 2009. **69**(19): p. 7672-7680.
- 1163 60. Lanz, T.A., et al., *Studies of Abeta pharmacodynamics in the brain, cerebrospinal fluid,*  
1164 *and plasma in young (plaque-free) Tg2576 mice using the gamma-secretase inhibitor*  
1165 *N2-[(2S)-2-(3,5-difluorophenyl)-2-hydroxyethanoyl]-N1-[(7S)-5-methyl-6-oxo-6,7-di*  
1166 *hydro-5H-dibenzo[b,d]azepin-7-yl]-L-alaninamide (LY-411575)*. J Pharmacol Exp  
1167 Ther, 2004. **309**(1): p. 49-55.
- 1168 61. Nawrocki, S.T., et al., *MLN4924: a novel first-in-class inhibitor of NEDD8-activating*  
1169 *enzyme for cancer therapy*. Expert Opin Investig Drugs, 2012. **21**(10): p. 1563-73.
- 1170 62. Kinoshita, E., et al., *Phosphate-binding tag, a new tool to visualize phosphorylated*  
1171 *proteins*. Mol Cell Proteomics, 2006. **5**(4): p. 749-57.
- 1172 63. Gupta-Rossi, N., et al., *Functional interaction between SEL-10, an F-box protein, and*  
1173 *the nuclear form of activated Notch1 receptor*. Journal of Biological Chemistry, 2001.  
1174 **276**(37): p. 34371-34378.
- 1175 64. Oberg, C., et al., *The Notch intracellular domain is ubiquitinated and negatively*  
1176 *regulated by the mammalian sel-10 homolog*. Journal of Biological Chemistry, 2001.  
1177 **276**(38): p. 35847-35853.
- 1178 65. Li, N., et al., *Cyclin C is a haploinsufficient tumour suppressor*. Nat Cell Biol, 2014.  
1179 **16**(11): p. 1080-91.
- 1180 66. Thompson, B.J., et al., *The SCFFBW7 ubiquitin ligase complex as a tumor suppressor*  
1181 *in T cell leukemia*. J Exp Med, 2007. **204**(8): p. 1825-35.
- 1182 67. Orlicky, S., et al., *Structural Basis for Phosphodependent Substrate Selection and*  
1183 *Orientation by the SCFCdc4 Ubiquitin Ligase*. Cell, 2003. **112**(2): p. 243-256.
- 1184 68. Vassilev, L.T., et al., *Selective small-molecule inhibitor reveals critical mitotic functions*  
1185 *of human CDK1*. Proc Natl Acad Sci U S A, 2006. **103**(28): p. 10660-5.
- 1186 69. Bashir, T. and M. Pagano, *Cdk1: the dominant sibling of Cdk2*. Nat Cell Biol, 2005.  
1187 **7**(8): p. 779-81.
- 1188 70. Satyanarayana, A. and P. Kaldis, *Mammalian cell-cycle regulation: several Cdks,*  
1189 *numerous cyclins and diverse compensatory mechanisms*. Oncogene, 2009. **28**: p.  
1190 2925.
- 1191 71. Kassardjian, A., et al., *The Transcription Factor YY1 Is a Novel Substrate for Aurora B*  
1192 *Kinase at G2/M Transition of the Cell Cycle*. Vol. 7. 2012. e50645.
- 1193 72. Swaffer, M.P., et al., *CDK Substrate Phosphorylation and Ordering the Cell Cycle*. Cell,  
1194 2016. **167**(7): p. 1750-1761 e16.

- 1195 73. Lim, S. and P. Kaldis, *Cdks, cyclins and CKIs: roles beyond cell cycle regulation*.  
1196 Development, 2013. **140**(15): p. 3079-93.
- 1197 74. Berthet, C., et al., *Cdk2 knockout mice are viable*. Curr Biol, 2003. **13**(20): p. 1775-85.
- 1198 75. Chi, Y., et al., *Identification of CDK2 substrates in human cell lysates*. Genome Biol,  
1199 2008. **9**(10): p. R149.
- 1200 76. Santamaria, D., et al., *Cdk1 is sufficient to drive the mammalian cell cycle*. Nature,  
1201 2007. **448**(7155): p. 811-U8.
- 1202 77. Satyanarayana, A., et al., *Genetic substitution of Cdk1 by Cdk2 leads to embryonic*  
1203 *lethality and loss of meiotic function of Cdk2*. Development, 2008. **135**(20): p. 3389-  
1204 400.
- 1205 78. Diril, M.K., et al., *Cyclin-dependent kinase 1 (Cdk1) is essential for cell division and*  
1206 *suppression of DNA re-replication but not for liver regeneration*. Proc Natl Acad Sci U  
1207 S A, 2012. **109**(10): p. 3826-31.
- 1208 79. Chiang, M.Y., et al., *Identification of a conserved negative regulatory sequence that*  
1209 *influences the leukemogenic activity of NOTCH1*. Molecular and Cellular Biology,  
1210 2006. **26**(16): p. 6261-6271.
- 1211 80. Nosedá, M., et al., *Notch activation induces endothelial cell cycle arrest and*  
1212 *participates in contact inhibition: role of p21Cip1 repression*. Mol Cell Biol, 2004.  
1213 **24**(20): p. 8813-22.
- 1214 81. Joshi, I., et al., *Notch signaling mediates G1/S cell-cycle progression in T cells via*  
1215 *cyclin D3 and its dependent kinases*. Blood, 2009. **113**(8): p. 1689-98.
- 1216 82. Sarmiento, L.M., et al., *Notch1 modulates timing of G1-S progression by inducing SKP2*  
1217 *transcription and p27 Kip1 degradation*. J Exp Med, 2005. **202**(1): p. 157-68.
- 1218 83. Kwon, M. and B.L. Firestein, *DNA transfection: calcium phosphate method*. Methods  
1219 Mol Biol, 2013. **1018**: p. 107-10.
- 1220 84. Ito, G., et al., *Phos-tag analysis of Rab10 phosphorylation by LRRK2: a powerful assay*  
1221 *for assessing kinase function and inhibitors*. Biochem J, 2016. **473**(17): p. 2671-85.
- 1222 85. Dale, J.K., et al., *Oscillations of the snail genes in the presomitic mesoderm coordinate*  
1223 *segmental patterning and morphogenesis in vertebrate somitogenesis*. Dev Cell, 2006.  
1224 **10**(3): p. 355-66.
- 1225 86. Gibb, S., et al., *Interfering with Wnt signalling alters the periodicity of the segmentation*  
1226 *clock*. Dev Biol, 2009. **330**(1): p. 21-31.
- 1227

# Mathematical model

## 1 NICD - Cell cycle model

To account for the experimental observations of NICD degradation in cell lines, we develop a cell cycle dependent model of NICD production and degradation (see Figure 8A). The position of the  $j^{\text{th}}$  cell in the cell cycle is represented by a set of  $K$  discrete state variables,  $X_{ij}(t)$ , defined such that

$$\sum_{i=1}^K X_{ij} = 1, \quad X_{ij} \in \{0, 1\}. \quad (1)$$

It is assumed that cells transition sequentially between states at rate  $r_1$  and that mitosis is followed by  $G_1$  entry.

The averaged fraction of cells in state  $i$ , given by

$$\langle X_i \rangle = \frac{1}{n} \sum_j X_{ij}, \quad (2)$$

where  $n$  is the number of cells in the experiment, satisfy

$$\frac{d\langle X_1 \rangle}{dt} = r_1(\langle X_K \rangle - \langle X_1 \rangle), \quad (3)$$

$$\frac{d\langle X_j \rangle}{dt} = r_1(\langle X_{j-1} \rangle - \langle X_j \rangle), \quad j = 2, \dots, K. \quad (4)$$

We note that (author?) (1) propose a similar model and show that relatively large number of compartments ( $K = 25$ ) compartments can be needed to reproduce experimentally observed variances in cell cycle distribution times.

Letting  $\langle X(t) \rangle$  represent the population average fraction of cells where CDKs are active, then

$$\langle X \rangle(t) = \sum_{j \in M} \langle X_j \rangle, \quad (5)$$

where  $M$ , the set of CDK active states, has  $m$  members.

We make the following assumptions about NICD: (i) NICD exists in two states (non-phosphorylated and phosphorylated); (ii) NICD is produced and degraded at constant rates  $k_1$  and  $k_7$ , respectively; (iii) NICD is phosphorylated by CDK1 and/or CDK2 at

rate  $k_3$ ; (iv) phosphorylated NICD has a larger degradation rate,  $k_6$ , than the background rate,  $k_7$ ; and (v) dephosphorylation occurs at rate  $k_2$ . Letting  $N_{1j}(t)$  and  $N_{2j}(t)$  represent the amount of NICD and phospho-NICD in the  $j^{\text{th}}$  cell at time  $t$ , the population averages are defined to be

$$\langle N_1 \rangle = \frac{1}{n} \sum_j N_{1j} \quad \text{and} \quad \langle N_2 \rangle = \frac{1}{n} \sum_j N_{2j}, \quad (6)$$

and satisfy

$$\frac{d\langle N_1 \rangle}{dt} = k_1 + k_2 \langle N_2 \rangle - k_3 \left\langle \sum_{j \in C} X_j N_1 \right\rangle - k_7 \langle N_1 \rangle, \quad (7)$$

$$\frac{d\langle N_2 \rangle}{dt} = k_3 \left\langle \sum_{j \in C} X_j N_1 \right\rangle - k_2 \langle N_2 \rangle - (k_6 + k_7) \langle N_2 \rangle. \quad (8)$$

As the cell cycle variables are uncoupled from the NICD dynamics, in a typical cell line experiment each of the  $X_j$ 's will tend to the equilibrium value

$$X_j = \frac{1}{K}, \quad (9)$$

and the fraction of CDK active cells is

$$X = \frac{m}{K}.$$

Hence equations (8) reduce to

$$\frac{d\langle N_1 \rangle}{dt} = k_1 + k_2 \langle N_2 \rangle - k_3 \frac{m}{K} \langle N_1 \rangle - k_7 \langle N_1 \rangle, \quad (10)$$

$$\frac{d\langle N_2 \rangle}{dt} = k_3 \frac{m}{K} \langle N_1 \rangle - k_2 \langle N_2 \rangle - (k_6 + k_7) \langle N_2 \rangle. \quad (11)$$

To compute NICD levels equations (11) are solved to steady state ( $N_1^*$ ,  $N_2^*$ ) and the total amount of NICD (Figure 8B and 8C) is

$$N^* = N_1^* + N_2^*.$$

LY treatment experiments, in which the production of NICD is reduced owing to gamma-secretase inhibition, are simulated by setting  $k_1 = 0$ . As PurB/Roscovetine is assumed to inhibit CDK2, the effect in the cell cycle synchronised experiments is to reduce the parameter  $m$ . As MLN treatment inhibits FBXW7 mediated degradation, it is simulated by removing the fast decay mode (i.e.  $k_6 = 0$ ).

Now consider a situation in which cells are synchronised as a result of double thymidine block. At the point of release the cell cycle distribution is no longer at equilibrium, rather the initial conditions are

$$X_i(0) = \begin{cases} 1/s & i \in S \\ 0 & \text{otherwise.} \end{cases} \quad (12)$$

where  $S$  is a set of states where cells get paused as a result of double thymidine block. After the cells are released from the cell cycle block there are peaks of CDK activity (see Figure 8B) and therefore dynamic levels of NICD.



## 2 Somitogenesis clock and the cell cycle

To explore the coupling between cell cycle mediated NICD degradation and the somitogenesis clock oscillator in PSM tissue, we introduce an additional set of variables,  $\theta_i(t)$ , that represent the position of the  $i^{\text{th}}$  cell in the somitogenesis clock cycle.

As PSM oscillators are coupled via Delta-Notch signalling we consider a phase coupled oscillator model (e.g. 2; 3; 4) of the caudal PSM given

$$\frac{d\theta_i}{dt} = \omega_i(X_1, X_2, \dots, X_K) + A \sum_j \sin(\theta_j - \theta_i), \quad (13)$$

where  $\omega_i$ , the natural frequency of the  $i^{\text{th}}$  cell, is a functional of cell cycle position, the sum is taken over all oscillators and the coupling function represents the effect of Delta-Notch signalling in the caudal PSM.

In a previous model (5) we demonstrated how competition between NICD and Hes7 could yield a phenotype in which increased levels of NICD are correlated with a longer clock period; here we impose this assumption in the phase coupled oscillator model by assuming that the clock frequency is inversely correlated with levels of NICD (Figure 8E). Hence as the cell progresses through the cell cycle, basal levels of NICD fluctuate and modify the natural frequency. We assume that

$$\omega_i(X_1, X_2, \dots, X_K) = \begin{cases} r\omega_0 & \text{CDK active} \\ \omega_0 & \text{otherwise.} \end{cases} \quad (14)$$

where the parameter  $r$  represents the degree of acceleration of the clock when CDK is active.

Equations (13) –(14) represent a mathematical model of coupled PSM oscillators whose frequencies are modulated by the cell cycle position. The model allows us to explore whether there is an emergent population-scale period and how it is affected by perturbing the cell cycle. To do this we simulate a population of  $N$  cells and find that given adequate oscillator coupling the oscillators synchronise to an emergent frequency which is an average over the individual oscillator frequencies

## 3 Parameter inference

### 3.1 Cell cycle

The parameters used in the model are presented in Table 2. To recapitulate the cell cycle phase distributions presented in Figure 6 of the Main text we use a 35 state model. The transition rate between compartments,  $r_1$ , is defined such that the mean time for a cell to progress from state 1 to is the cell cycle period,  $T_C = 12\text{h}$ . Based upon the data in Figure 6 in the Main Text we assume the cell cycle times presented in Table 2 (see Figure 1).

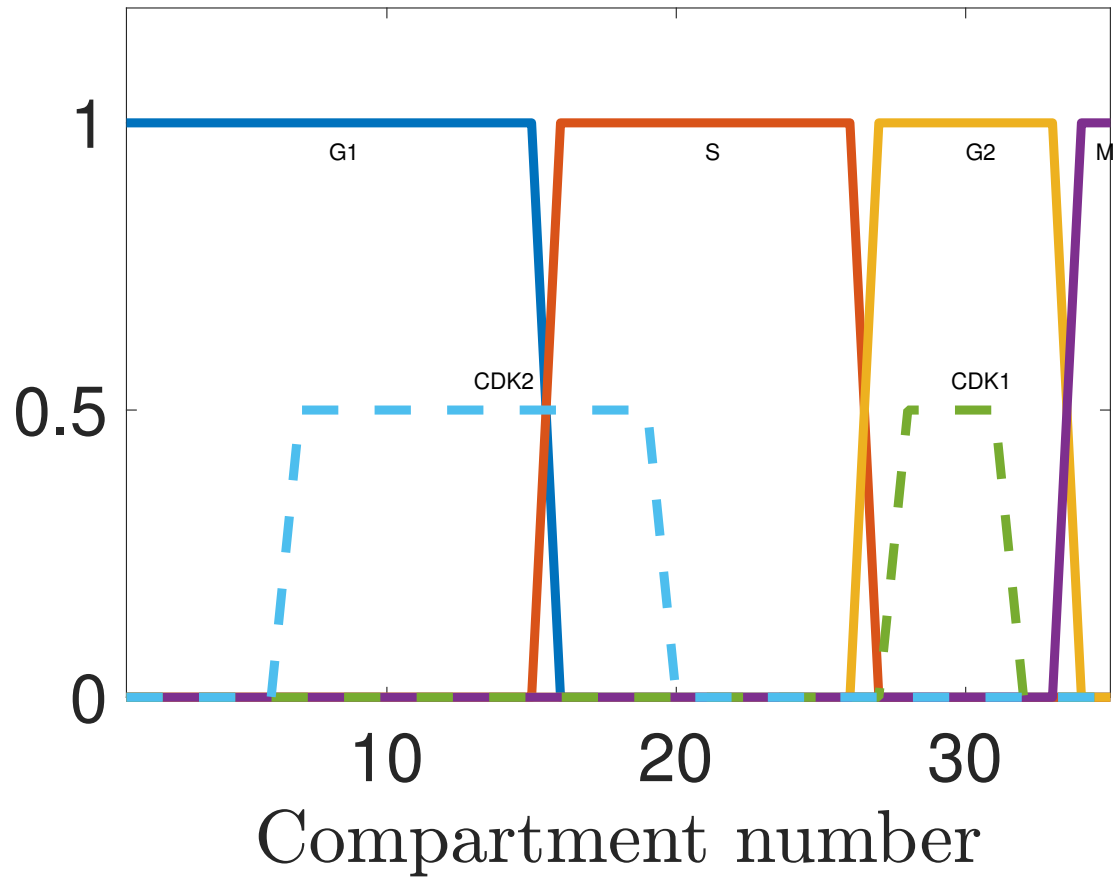

Figure 1: Transition through the cell cycle states (solid lines) and correspondent regions of high CDK2 and CDK 1 activity (dashed lines).

| Experiment | NICD | pNICD |
|------------|------|-------|
| Control    | 0.9  | 0.1   |
| MLN        | 1.5  | 2.0   |
| Rosc       | 1.3  | 0.4   |

Table 1: Quantification of Western blots used for inference of parameters  $k_2$  and  $k_3$ .

| Parameter   | Value                 | Unit            | Description                                |
|-------------|-----------------------|-----------------|--------------------------------------------|
| $K$         | 35                    |                 | Number of compartments in cell cycle model |
| $T_C$       | 12.0                  | h               | Cell cycle period                          |
| $r_1$       | $\frac{\ln(2)}{KT_C}$ | $\text{h}^{-1}$ | Transfer rate between cell cycle states    |
| $k_1$       | 10.0                  | $\text{h}^{-1}$ | Rate of NICD production                    |
| $k_6$       | 12.0                  | $\text{h}^{-1}$ | Fbxw7 mediated NICD degradation rate       |
| $k_7$       | 1.6                   | $\text{h}^{-1}$ | Background NICD degradation rate           |
| $k_2$       | 3.1                   | $\text{h}^{-1}$ | NICD dephosphorylation rate                |
| $k_3$       | 10.0                  | $\text{h}^{-1}$ | NICD phosphorylation rate                  |
| $\omega_0$  | 2.5                   | $\text{h}^{-1}$ | somitogenesis clock frequency              |
| $A$         | [0,2.0]               | $\text{h}^{-1}$ | Oscillator coupling strength               |
| $r$         | [1,1.5]               | $\text{h}^{-1}$ | Somitogenesis clock acceleration factor    |
| $T_{G_1}$   | 4                     | h               | G1 duration                                |
| $T_S$       | 3                     | h               | S duration                                 |
| $T_{G_2}$   | 2                     | h               | G2 duration                                |
| $T_M$       | 1                     | h               | M duration                                 |
| $CDK2_{on}$ | [0.2,0.55]            | Nondim          | CDK2 active                                |
| $CDK1_{on}$ | [0.8,0.9]             | Nondim          | CDK1 active                                |
| $S$         | [0.4, 0.75]           | Nondim          | Thymidine block                            |

Table 2: A table with parameter values.

### 3.2 NICD modelling

The parameter  $k_1$  represents the number of molecules produced per cell per hour. The fast and slow degradation rates are values inferred from (**author?**) (5). To determine the parameters  $k_2$  and  $k_3$  we use the DMSO and MLN treatment Blot data presented in Figure 1 of the Main Text. The measured normalised levels of non-phosphorylated and phosphorylated forms of NICD in different conditions are given in Table 1. A least squares minimisation algorithm is used to minimise the error between the model and the data in Table 1 for the control and MLN datasets. Hence values for the parameters  $k_2$  and  $k_3$  are inferred.

### 3.3 Somitogenesis clock

The somitogenesis clock period in the mouse PSM is approximately two hours. As we do not have direct measurements of coupling strength or acceleration factor we simulate model behaviour over a range the specified parameter ranges.



## References

- [1] Yates CA, Ford MJ, Mort RL. A multi-stage representation of cell proliferation as a Markov process. arXiv preprint arXiv:170509718. 2017;.
- [2] Murray PJ, Maini PK, Baker RE. The clock and wavefront model revisited. *Journal of theoretical biology*. 2011;283(1):227–238.
- [3] Murray PJ, Maini PK, Baker RE. Modelling Delta-Notch perturbations during zebrafish somitogenesis. *Developmental biology*. 2013;373(2):407–421.
- [4] Morelli LG, Ares S, Herrgen L, Schröter C, Jülicher F, Oates AC. Delayed coupling theory of vertebrate segmentation. *HFSP journal*. 2009;3(1):55–66.
- [5] Wiedermann G, Bone RA, Silva JC, Bjorklund M, Murray PJ, Dale JK. A balance of positive and negative regulators determines the pace of the segmentation clock. *eLife*. 2015;4:e05842.
